# Supplementary material for: Dynamic optimization of COVID-19 vaccine prioritization in the context of limited supply
Source: Research Square preprint supplement (doi:10.21203/rs.3.rs-257573/v1), 2021-03-03
Supplement: Supplementary file 2 [file e09fc34d50678055d1d8d4e2.docx]

**Extended Data for “Dynamic optimization of COVID-19 vaccine prioritization in the context of limited supply”**


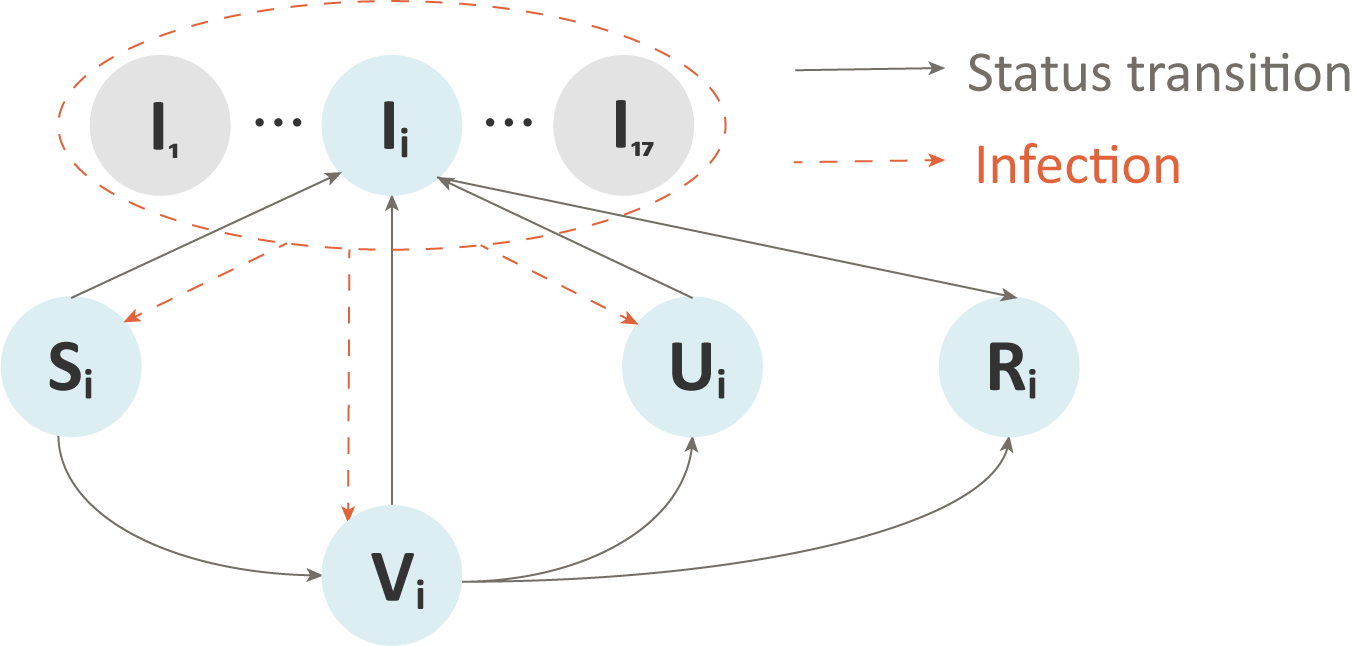


Extended Data Fig. 1 | Illustration of the compartment model. Age group *i, i* = 1, …,17*,* has five compartments: unvaccinated susceptible individuals (Si), vaccinated individuals (Vi), unprotected individuals who received the vaccine (Ui), infectious individuals (Ii), and immune individuals (either recovered from the infection or protected by the vaccine) (Ri). Vaccination (Vi), capturing the two-dose effect, represents the state post the first dose and prior to that the second dose take effect. People in the state Si, Vi and Ui may get infected through contacting with people in states I1, …, I17. The diagram applies to all-or-nothing model (1) and leaky model (7), with different transition rates across states. In particular, under leaky model, the transition rate from Vi to Ri is zero.


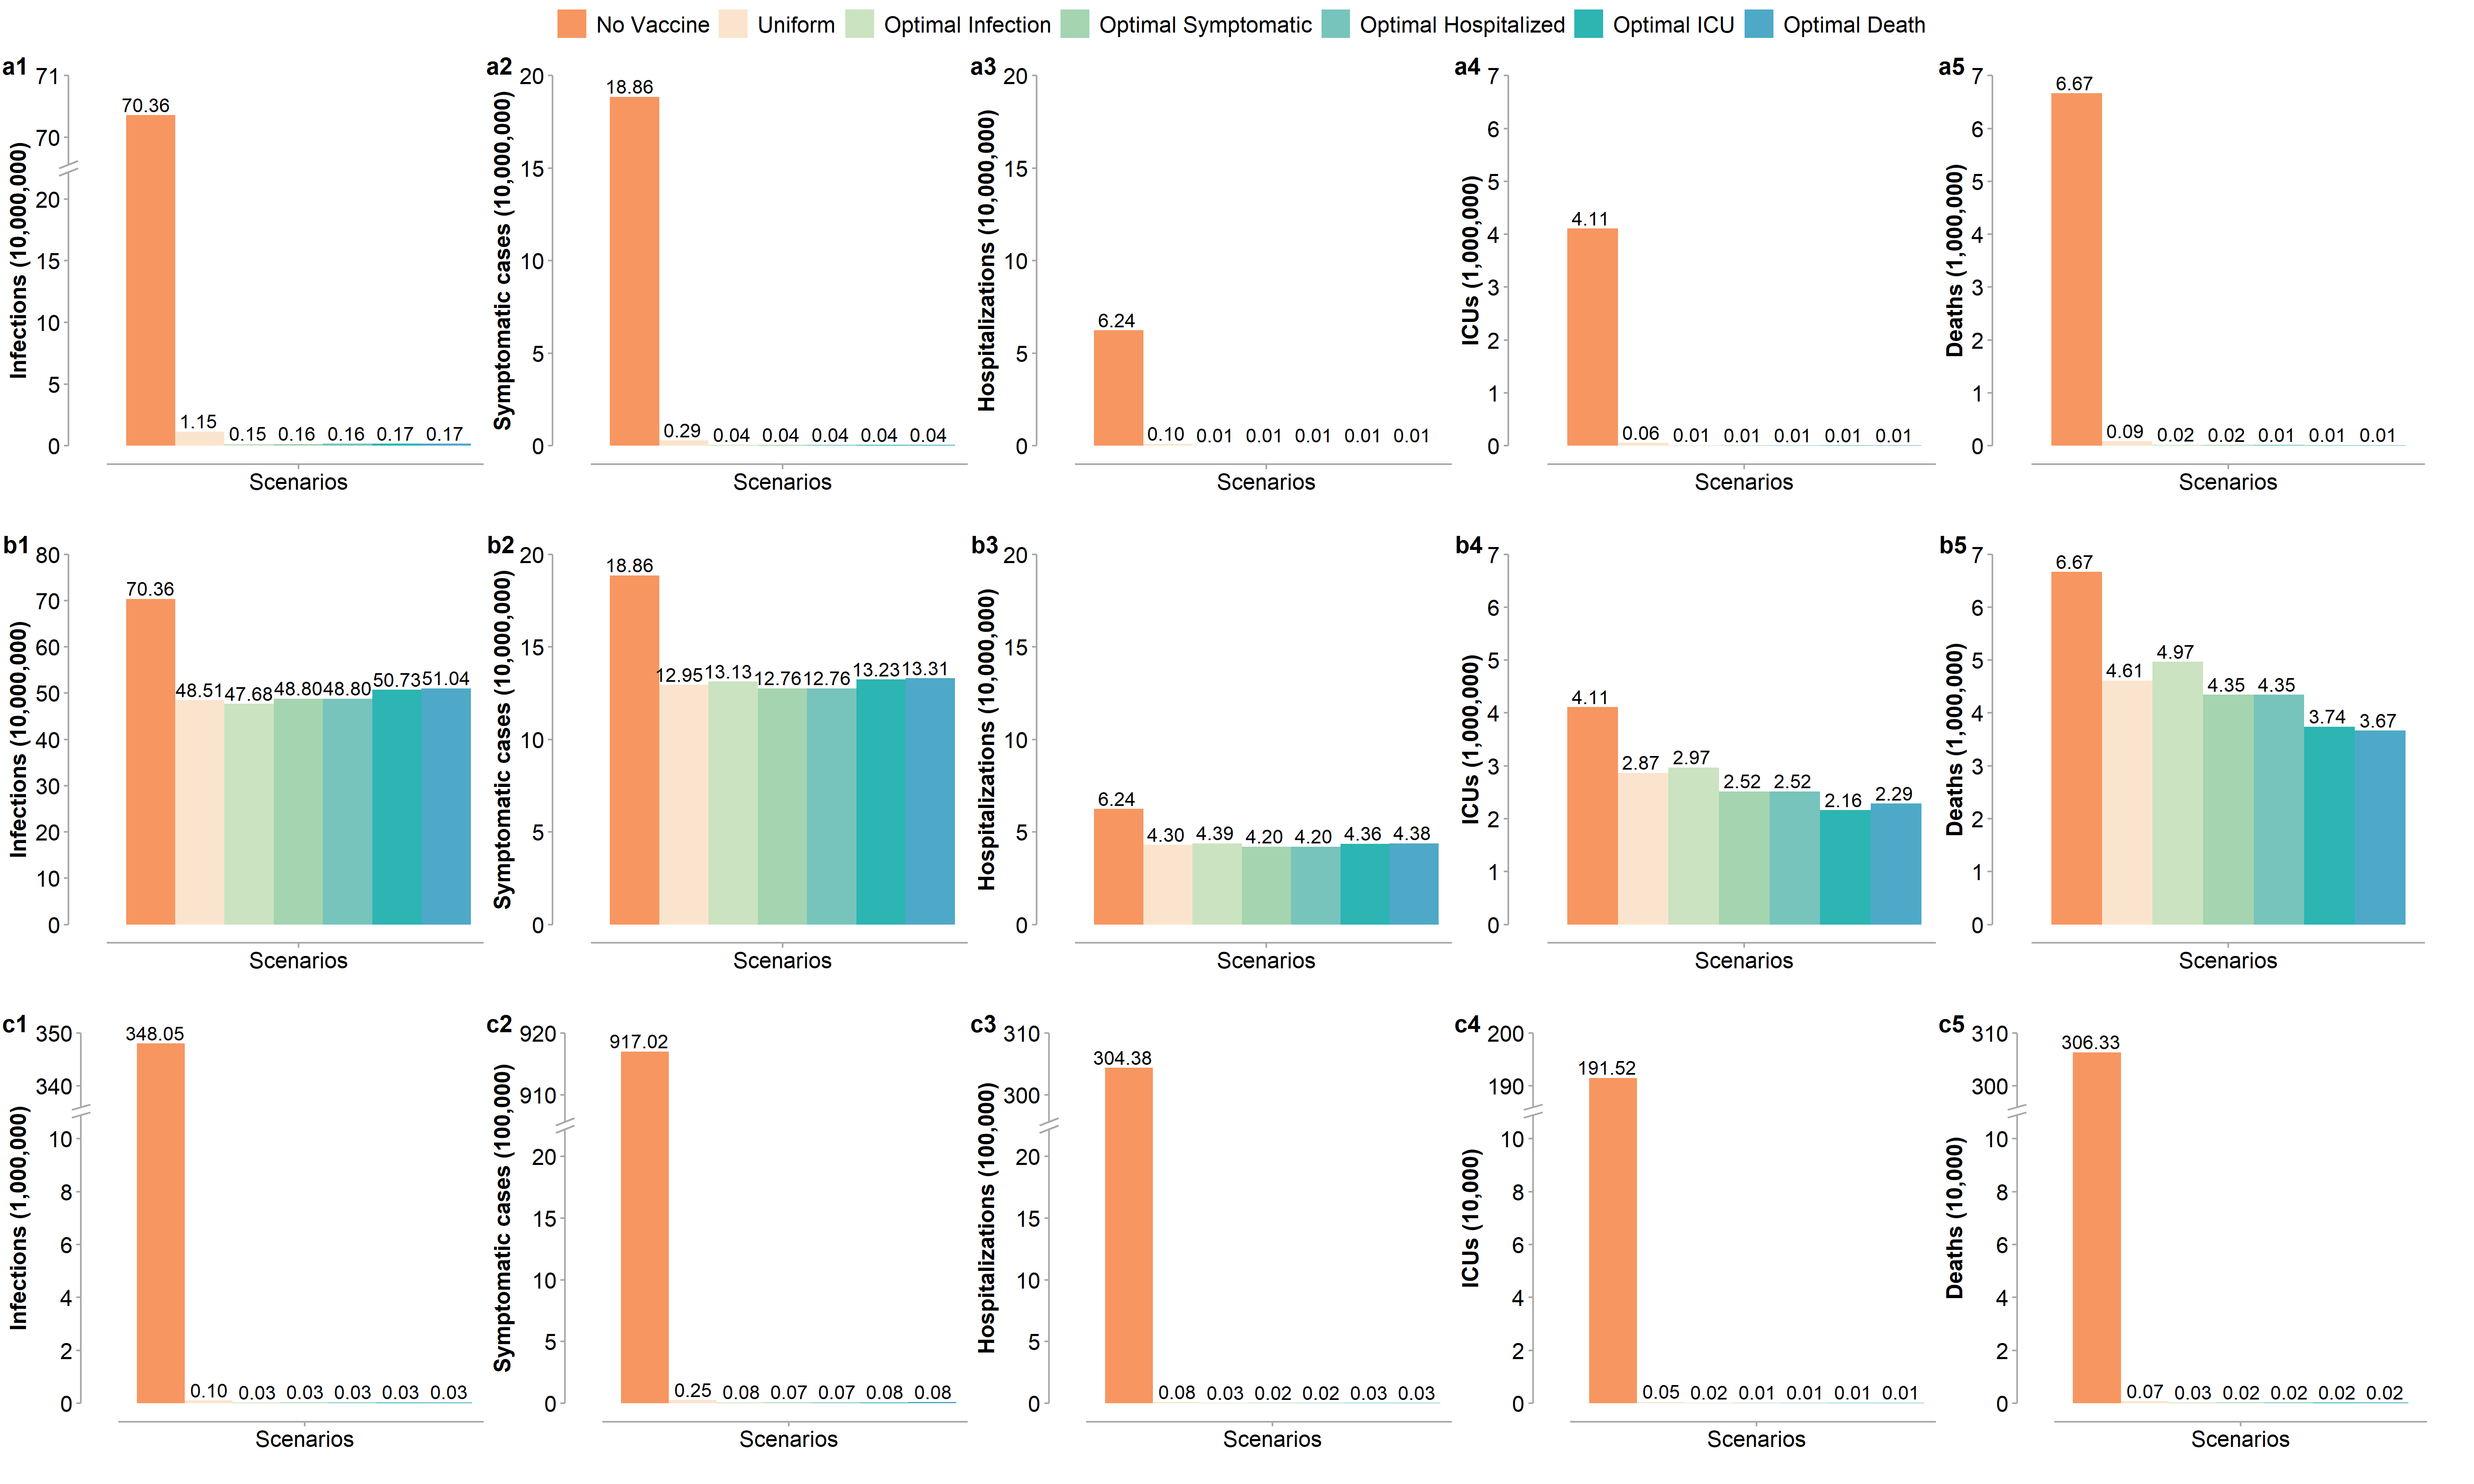


Extended Data Fig. 2 | Scenarios where the uniform strategy may have comparable performances to optimal strategies. a1, b1 and c1, The uniform strategy has comparable performances to optimal prioritization strategy on infections, under 3.5 million (rollout speed 0.24%), 1.0 million courses (rollout speed 0.07%), and R =1.25 respectively. a2-a5, b2-b5 and c2-c5, As panel a1, b1 and c1 respectively, but for the number of symptomatic cases, hospitalizations, ICUs, and deaths. Keys apply to all panels.


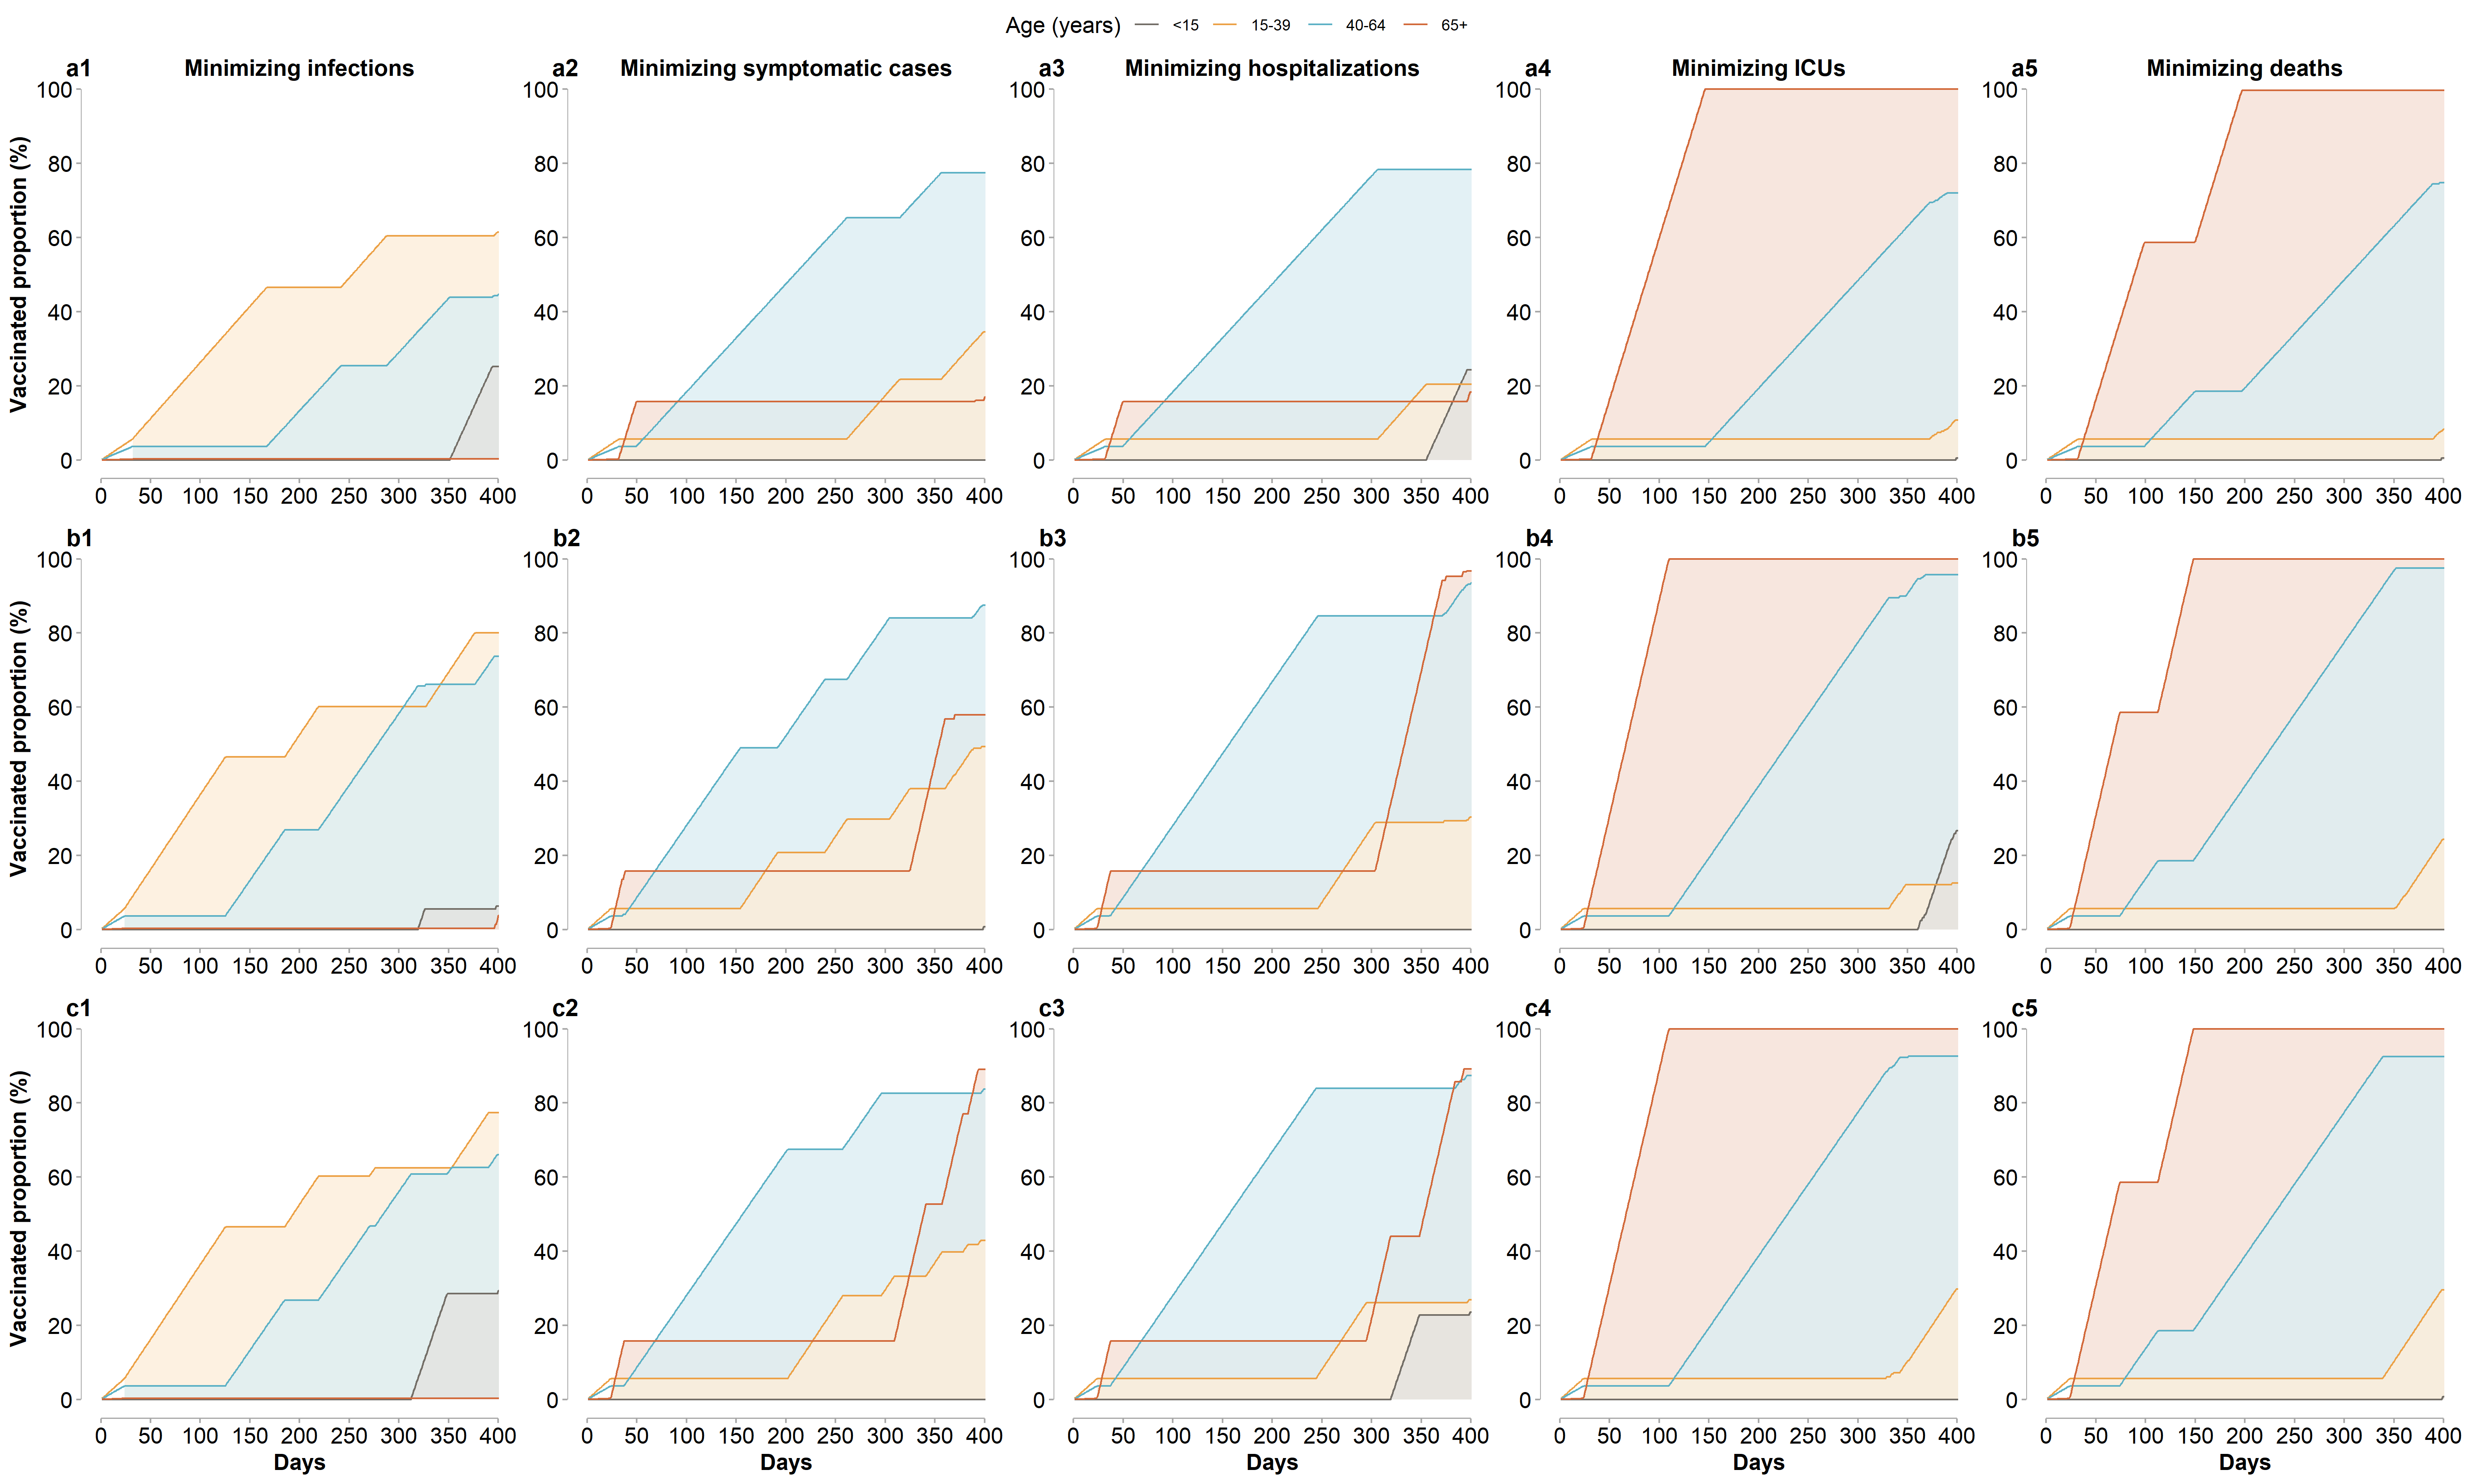


Extended Data Fig. 3 | Vaccinated proportions for difference prioritizations under three scenarios. a1, Prioritization strategy for minimizing infections, under 80% vaccine efficacy for people aged 15-59 and 80%×0.75 for the rest, and rollout speed 0.10% (1.5 million courses). b1, Strategy for minimizing infections with age-specific vaccine efficacy with 80% replaced by 90%, and rollout speed 0.14% (2.0 million courses). c1, Strategy for the scenario where vaccines have 60% efficacy preventing infections and 80% preventing symptomatic disease. a2-a5, b2-b5 and c2-c5, As panel a1, b1 and c1 respectively, but for minimizing symptomatic cases, hospitalizations, ICUs, and deaths. Shaded area refers to vaccine administration to the general populations. Lines refers to the vaccinated proportions including essential workers. Keys and labels apply to all panels.


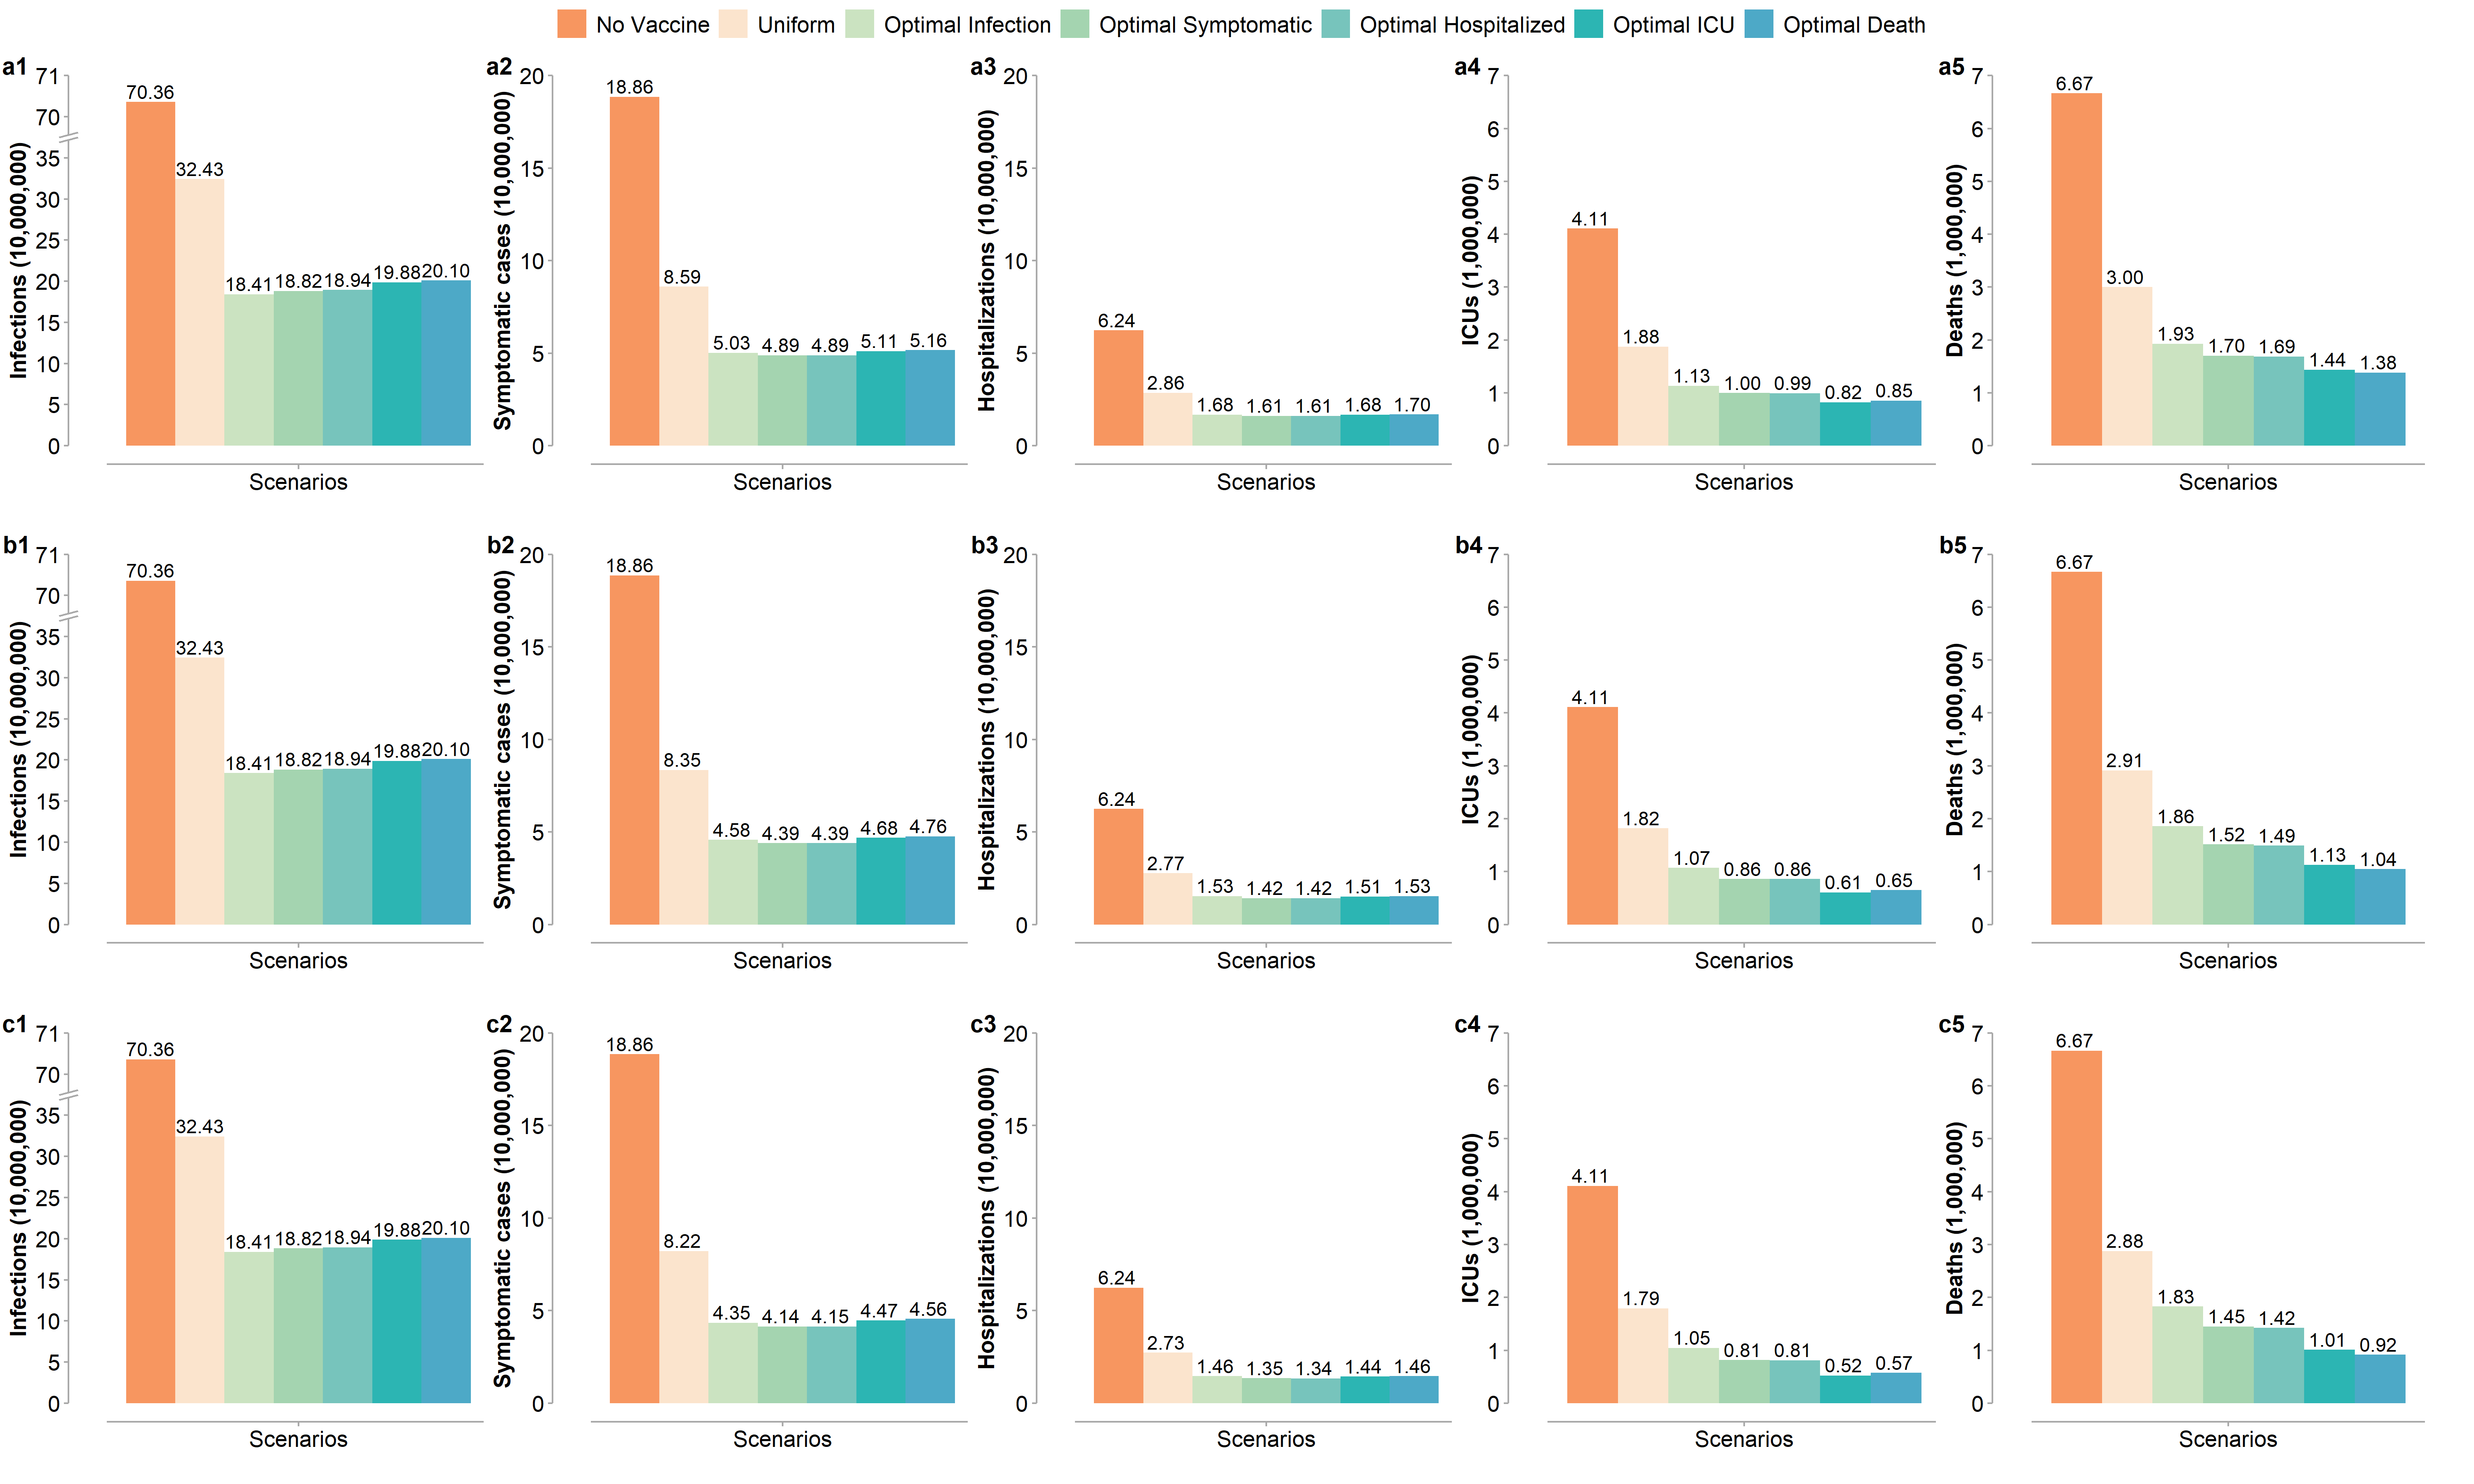


Extended Data Fig. 4 | Risk incidences under different prioritizations under 60% vaccine efficacy for people aged 15 -59 and 60%×0.75 for the rest on preventing infections and three levels on preventing symptomatic disease. a1, Infections under the same level on preventing symptomatic disease. b1, Infections under higher efficacy on preventing symptomatic disease with 60% replaced by 80%. c1, Infections under even higher levels on preventing symptomatic disease with 60% replaced by 90%. Higher efficacy on preventing symptomatic disease leads to fewer diseases of burden but the same total infections. a2-a5, b2-b5 and c2-c5, As panel a1, b1 and c1 respectively, but for the number of symptomatic cases, hospitalizations, ICUs, and deaths. Keys apply to all panels.


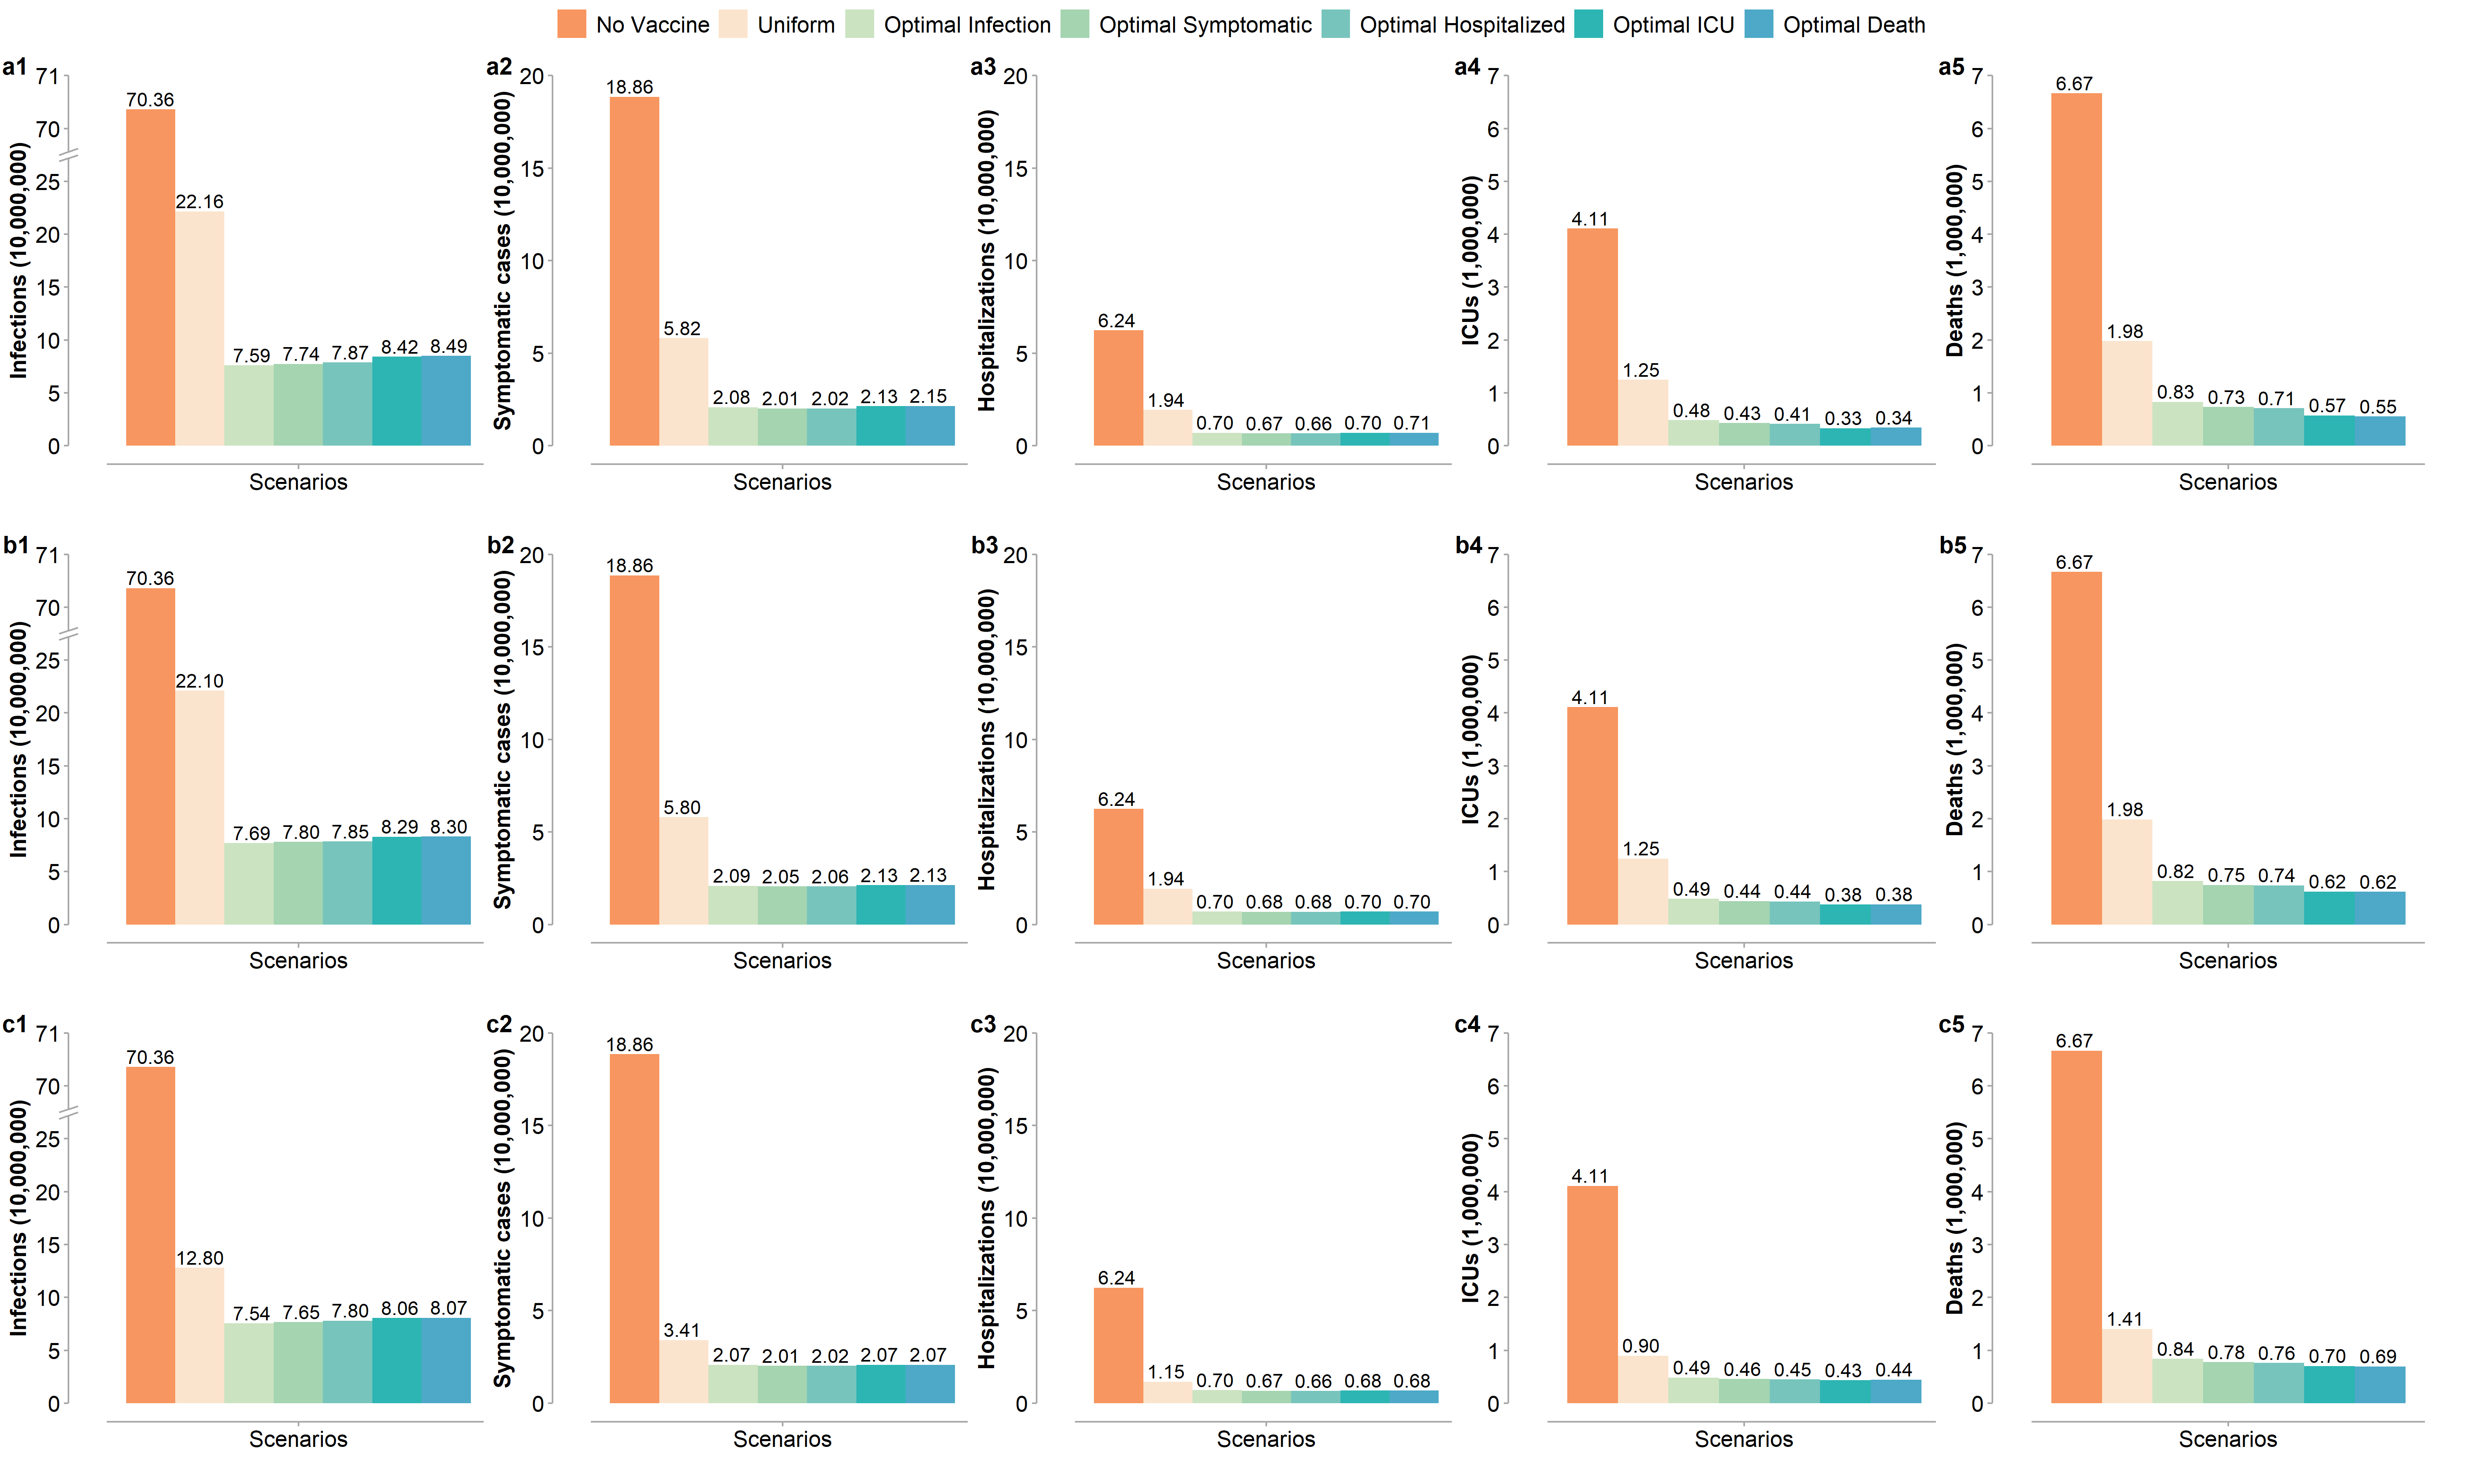


Extended Data Fig. 5 | Risk incidences under different prioritizations for scenarios with restrictions on allocations. a1, Infections under high vaccine acceptance using data in China. b1, Infections under low vaccine acceptance, 60% for general populations. c1, Infections when vaccinations excluding people under 15 and adults over 65. Optimal prioritizations have close results to the baseline (Fig. 2). The uniform strategy improves remarkably when vaccinations excluding the kids and the old. a2-a5, b2-b5 and c2-c5, As panel a1, b1 and c1 respectively, but for the number of symptomatic cases, hospitalizations, ICUs, and deaths. Keys apply to all panels.


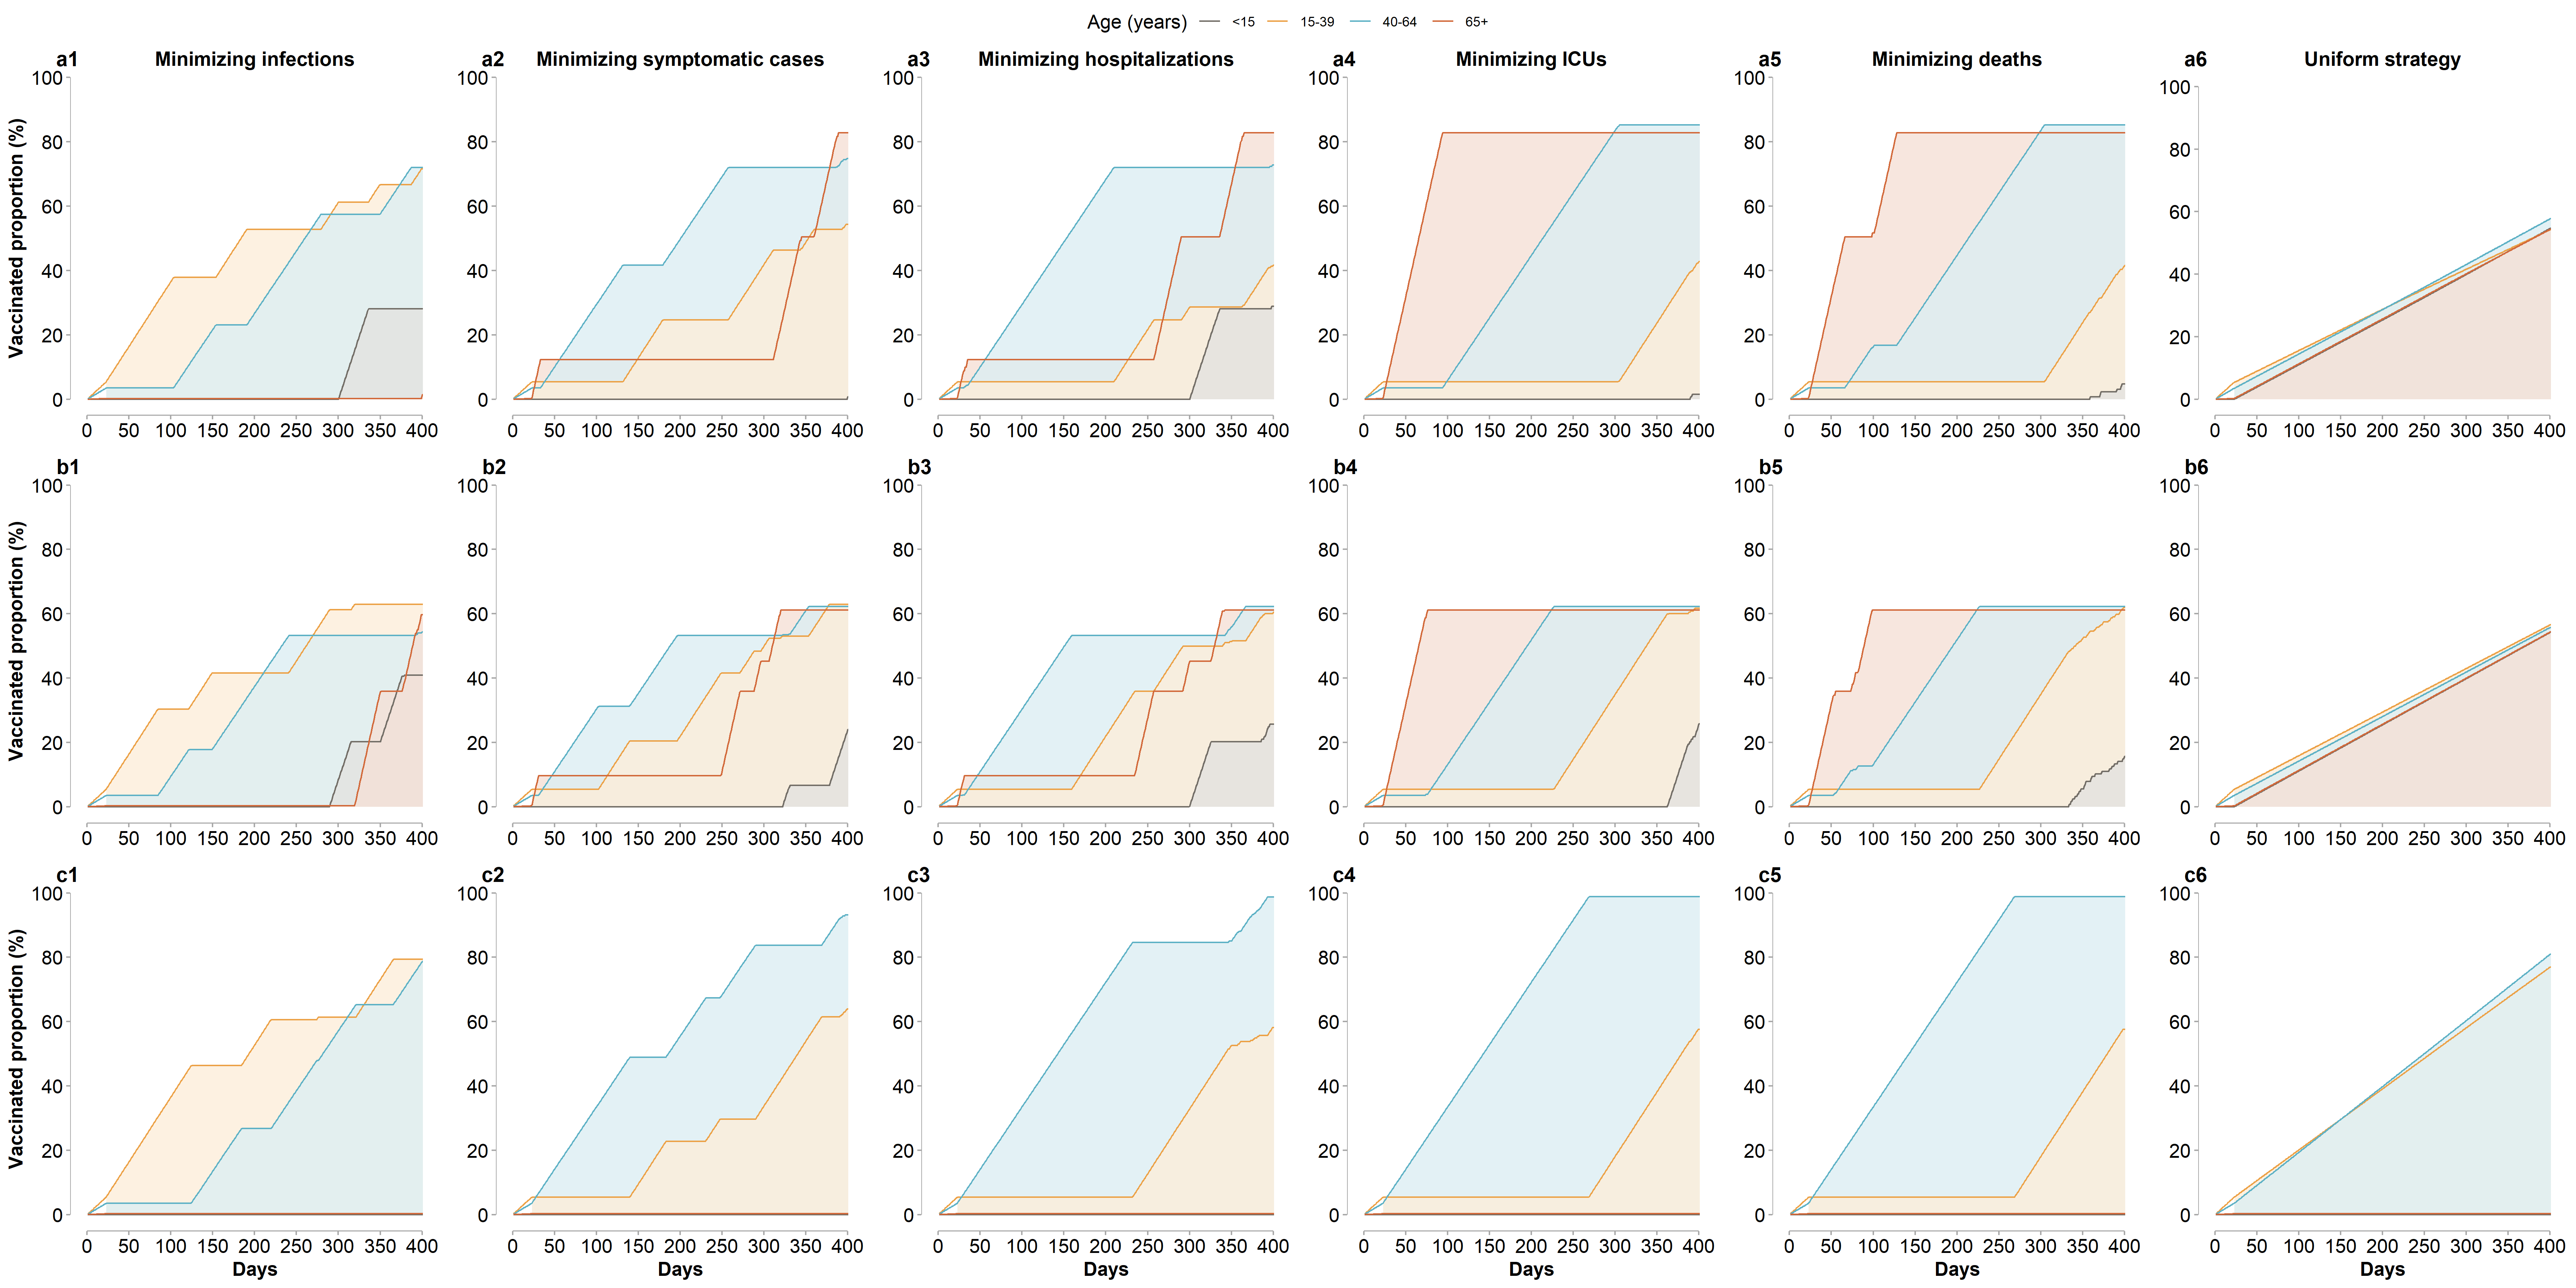


Extended Data Fig. 6 | Prioritization strategies under varying restrictions. a1, Optimal prioritization strategy for minimizing infections with high vaccine acceptance in China. b1, Optimal prioritization for minimizing infections under low vaccine acceptance, 60% for general populations. c1, Optimal prioritization for minimizing infections when vaccinations excluding people under 15 and adults over 65. The priority orders are similar to that in the baseline. a2-a5, b2-b5 and c2-c5, As panel a1, b1 and c1 respectively, but for minimizing symptomatic cases, hospitalizations, ICUs, and deaths. The priority orders are similar to that in the baseline. Keys apply to all panels. Shaded area refers to vaccine administration to the general populations. Lines refers to the vaccinated proportions including essential workers.


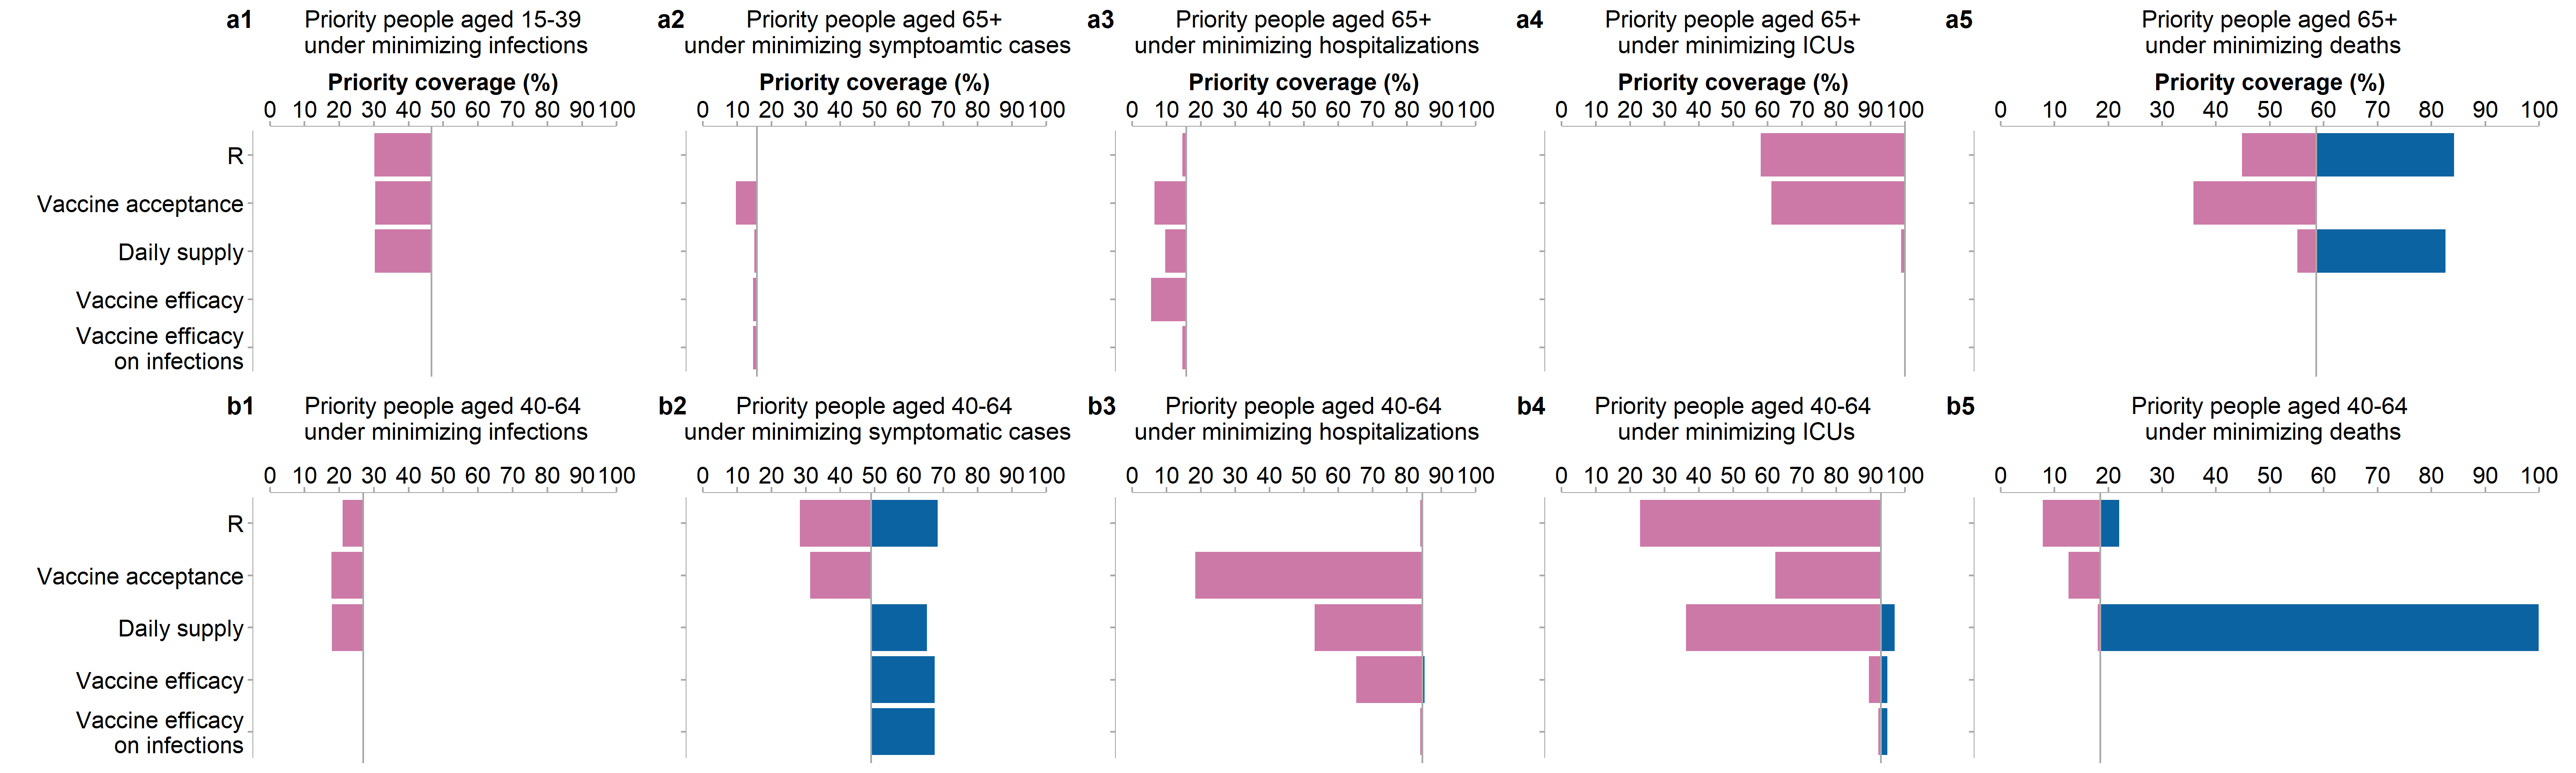


Extended Data Fig. 7 | Variations of priority coverages for the first two priority groups. a1-a5, for the first priority group and b1-b5, for the second priority groups, except that under minimizing symptomatic cases and hospitalizations with small R, the first priority group old adults over 65 and the second priority group adults aged 40-64 switches their priorities (Supplementary Fig. 5). Overall, coverages for the first two priority groups under minimizing infections have small variations across varying scenarios. When minimizing other risks, coverages for the first priority group still have small variations, while coverages for the second priority group may have relatively larger variations under some settings when the baseline coverages are too low (b5) or too high (b3, b4). These large variations are due to discontinuities in priorities. For example, when minimizing deaths, people aged 40-64 are given the second priority with a coverage of 19% in baseline and a final coverage of 96% (Fig. 1e), but with very high daily supplies, the group is given the second priority until almost full coverage is achieved.


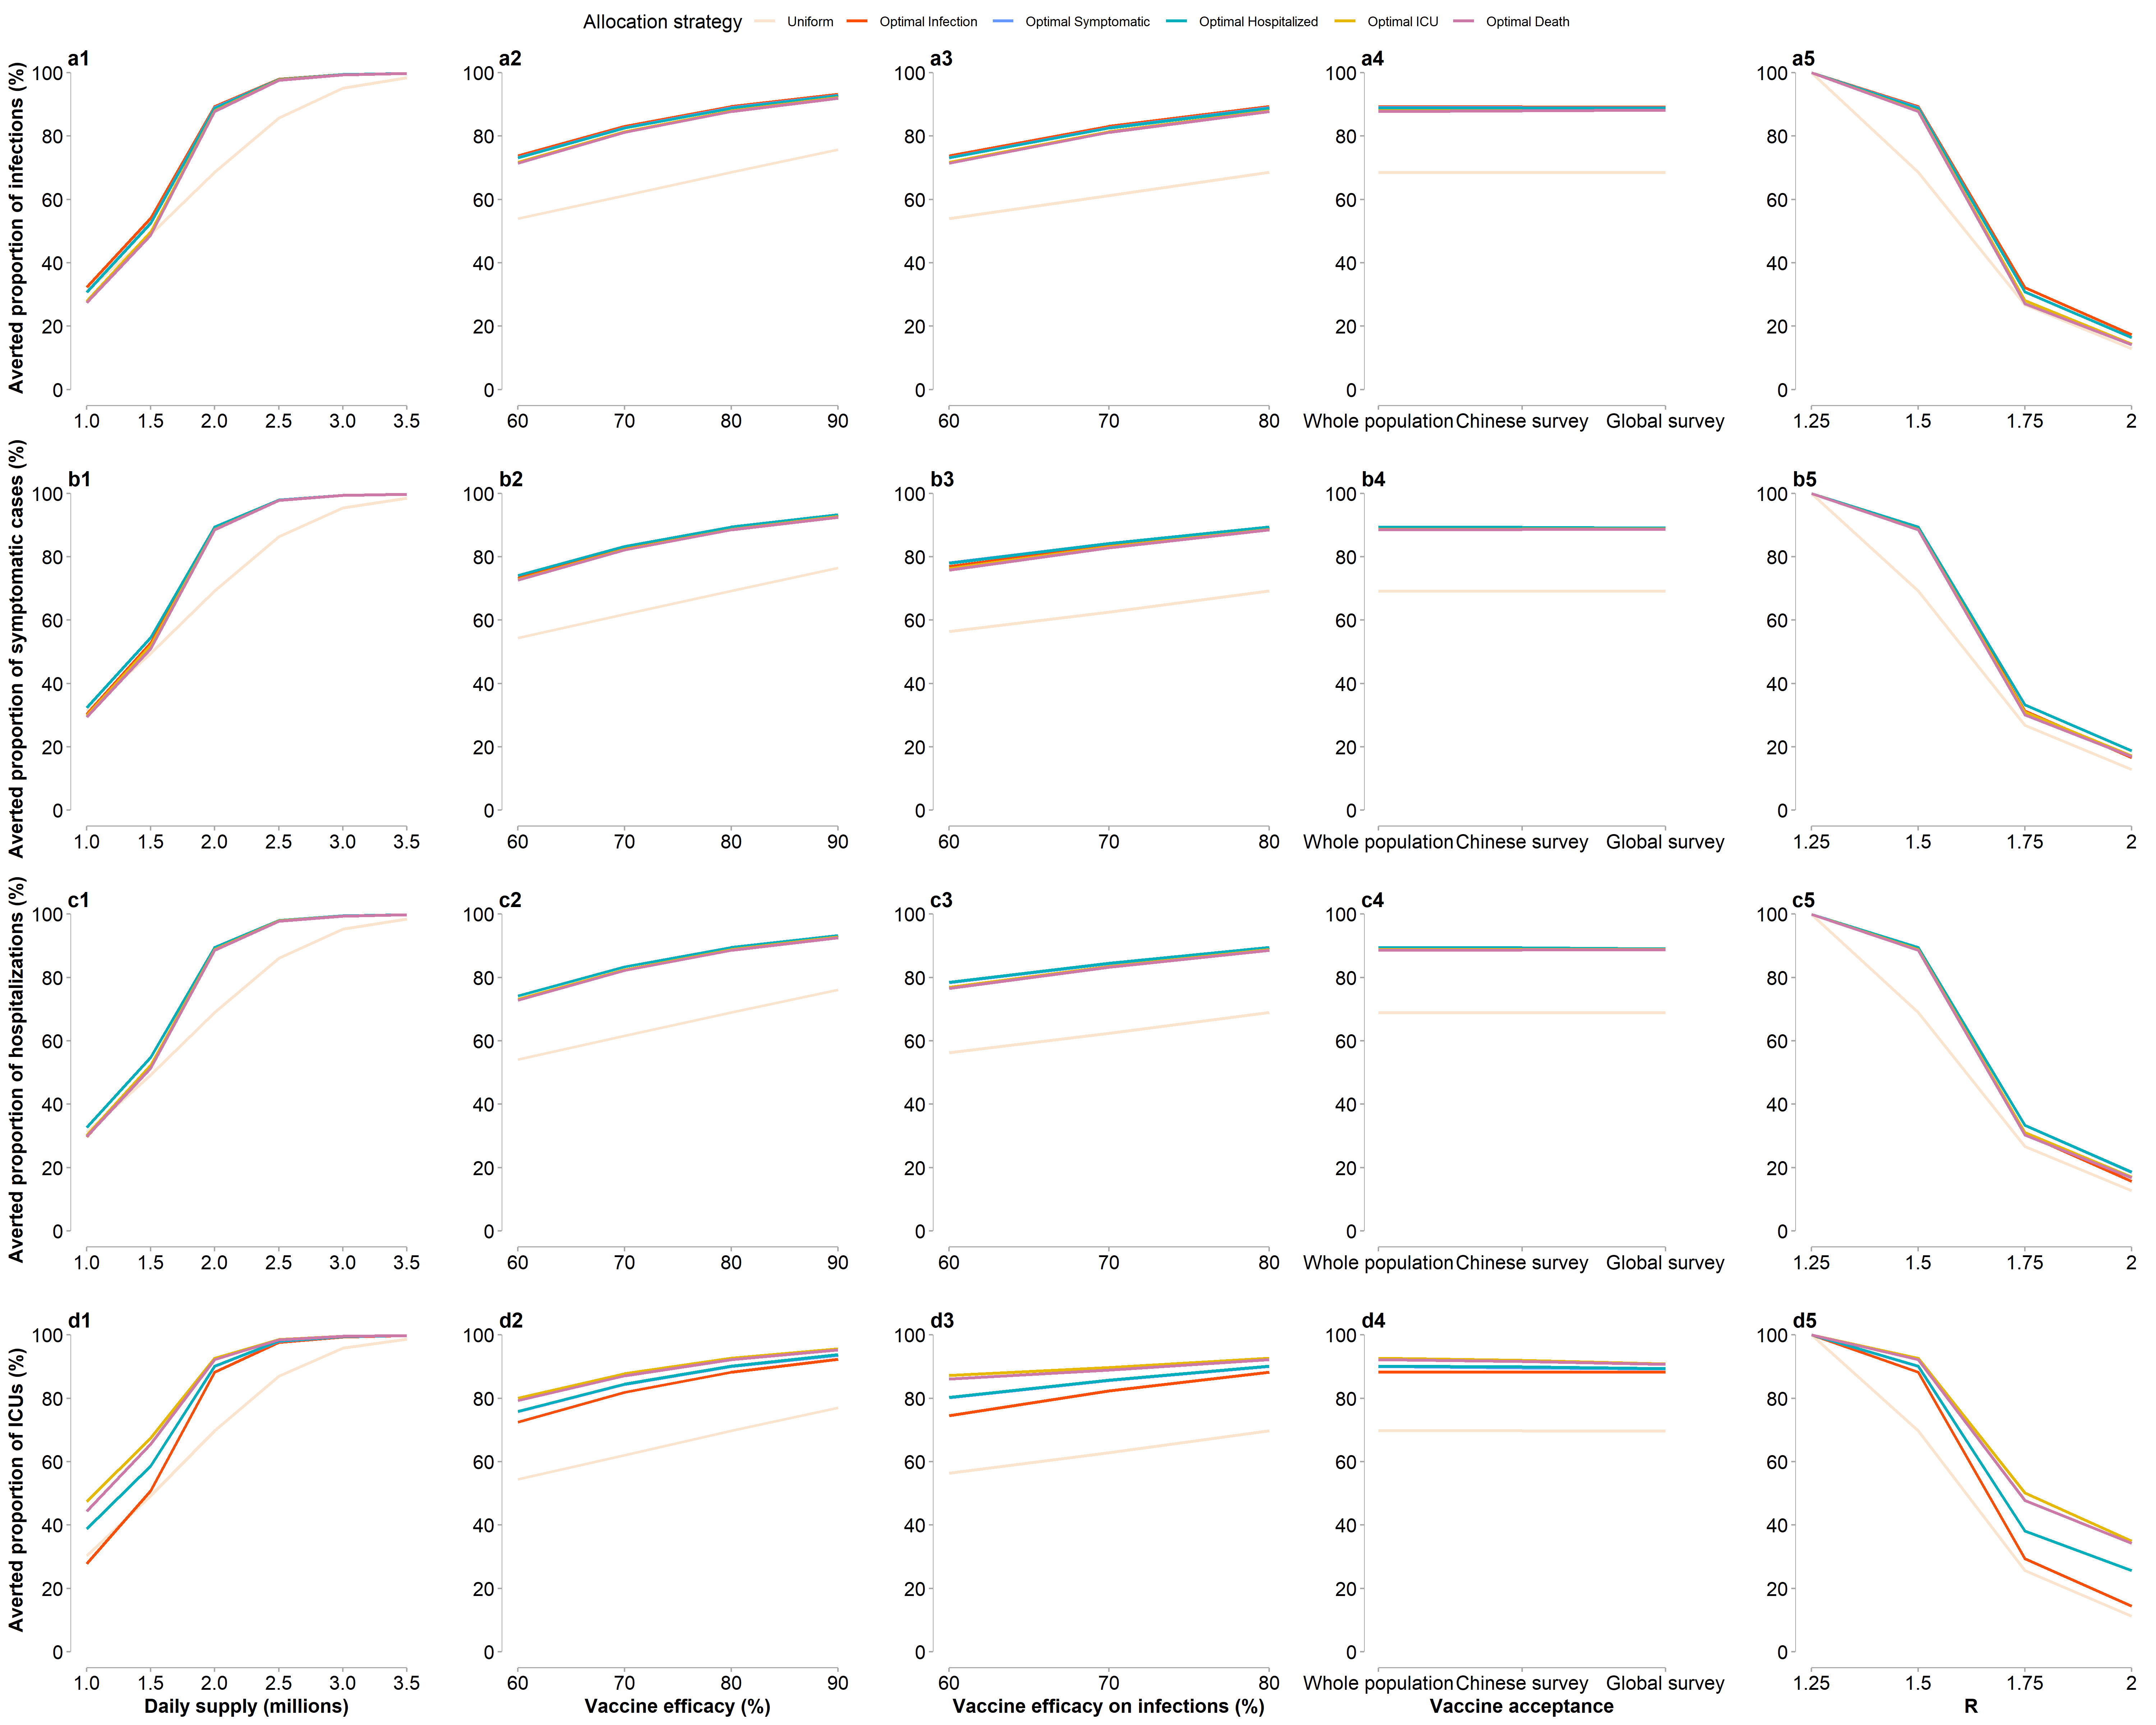


Extended Data Fig. 8 | Averted risks in comparison to the scenario with no vaccines. a1-a5, b1-b5, c1-c5, d1-d5, Averted proportion of infections, symptomatic cases, hospitalizations and ICUs. Patterns are similar to averted proportion of deaths in Fig. 3. Keys apply to all panels. Labels apply to panels in the same row (column).


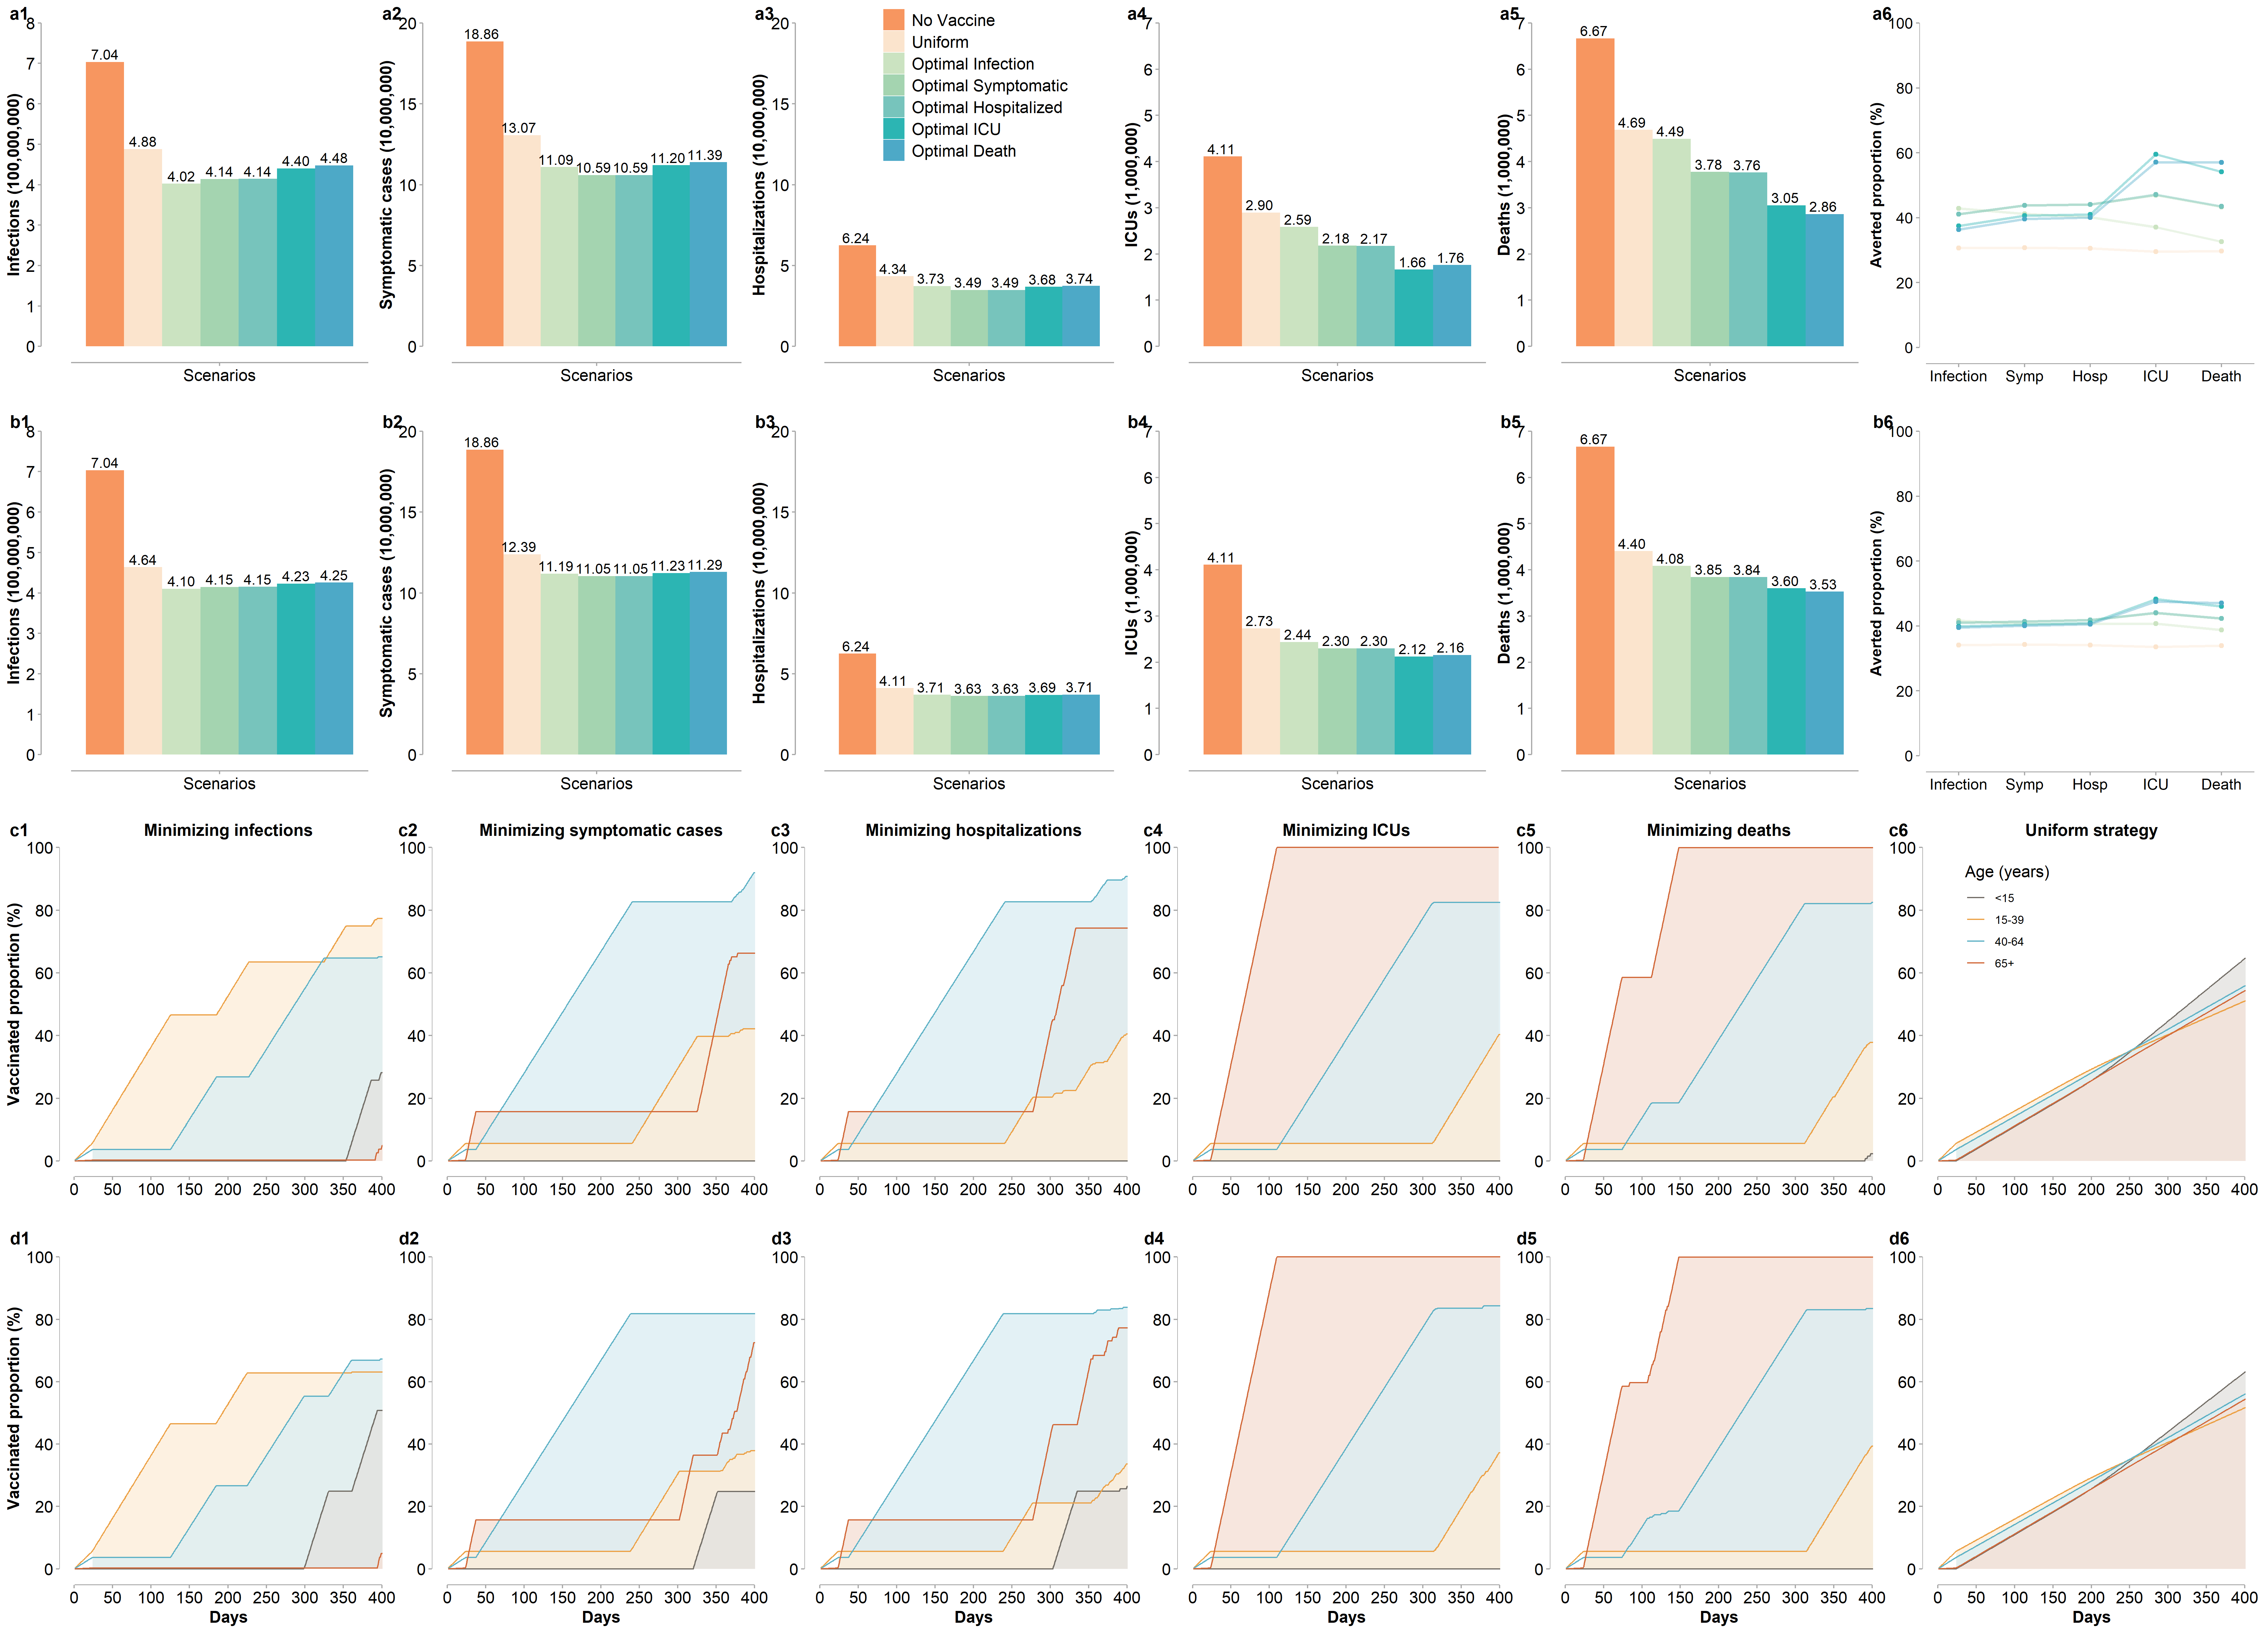


Extended Data Fig. 9 | Impact of mathematical modeling vaccine actions (rollout speed 0.14% and R = 1.5). Leaky model uses 80% vaccine efficacy for people aged 15-59 and 80%×0.75 for the rest, as in Figs. 1 and 2. All-or-nothing model replaces 80% by 30%. a1-a6 and b1-b6, risk incidences and averted proportions under the leaky and all-or-nothing respectively. c1 and d1, the optimal prioritization strategy for minimizing infections under the leaky and all-or-nothing respectively. c2-c6 and d2-d6, As panel c1 and d1 respectively, but for minimizing symptomatic cases, hospitalizations, ICUs and deaths, and the uniform strategy. The optimal prioritization strategies are similar under the two mechanisms and are similar to that in Fig. 1. The risk incidences under the leaky (80% efficacy) are close to that under the all-or-nothing with 30% efficacy, higher than that in Fig. 2. Keys in the first row apply to all panels in the first two rows, keys in the third row apply to all panels in the last two rows.

**Extended Data Table 1| Summary of parameters**

| **Parameter** | **Description** | **Baseline value** | **Reference** |
| --- | --- | --- | --- |
| *J* | Number of age groups | 17 |  |
| *Ni* | Population size for age group *i* | Extended Data Table 2 | 20 |
| *Ni,k* | Population size for age group *i* within tier *k* | Extended Data Table 2 | 30,31 |
| *β* | Transmission rate | Equation ( 3 ) | 25 |
| *1/γ* | Generation time | 5.5 days | 17 |
| *Ci,j* | Average contact number of people in the age group *i* with people in the age group *j* | Supplementary Fig. 6 | 18 |
| *si* | Relative susceptibility of age group *i* | Extended Data Table 2 | 17 |
| *ei* | Vaccine efficacy on infections for age group *i, i* = *4,.., 12* | 80% | 22 |
|  | Vaccine efficacy on infections for age group *i, i* *≤ 3, or i* *≥ 13* | 0.75×80% | 23,24 |
| *1/w* | Expected time from the first dose to that the vaccines take effect | 21+14 days | 21 |
| *risymp* | Risk of an infection developing symptoms for age group *i* | Extended Data Table 2 | 26 |
| *rihosp* | Risk of an infection needs hospitalizations for age group *i* | Extended Data Table 2 | 26,27 |
| *riicu* | Risk of an infection requires ICU for age group *i* | Extended Data Table 2 | 26,27 |
| *rideath* | Risk of an infection dies for age group *i* | Extended Data Table 2 | 26,28 |
| *c* | Daily supply of vaccine courses | 2.0 million | Supplementary Table 1 |
| *ai,1* | Potential acceptance of vaccines for age group *i* within the tier *1* | Extended Data Table 2 | 15 |
| *ai,2* | The general potential acceptance of vaccines for age group *i* within the tier *2* | Extended Data Table 2 | 15 |

Extended Data Table 2| Population demographics and risk distributions

| **Age group**  **(years)** |  | **Population size in tier 1** | **Population size in tier 2** | **Total population size** | **Relative susceptibility to infection** | **Vaccine acceptance (general population)** | **Risk of developing symptoms** | **Risk of requiring hospitalization** | **Risk of requiring ICU admission** | **Risk of death** |
| --- | --- | --- | --- | --- | --- | --- | --- | --- | --- | --- |
|  | *i* | *Ni,1* | *Ni,2* | *Ni* | *si* | *ai,2* | *risymp* | *rihosp* | *riicu* | *rideath* |
| **0-4** | 1 | 0 | 83,932,437 | 83,932,437 | 0.580 | 0.810 | 0.181 | 0.072 | 0.000 | 0.001 |
| **5-9** | 2 | 0 | 86,735,183 | 86,735,183 | 0.580 | 0.810 | 0.181 | 0.072 | 0.000 | 0.001 |
| **10-14** | 3 | 0 | 84,262,751 | 84,262,751 | 0.580 | 0.850 | 0.181 | 0.072 | 0.000 | 0.001 |
| **15-19** | 4 | 1,181,745 | 81,160,114 | 82,341,859 | 1.000 | 0.850 | 0.181 | 0.072 | 0.002 | 0.001 |
| **20-24** | 5 | 6,217,027 | 80,941,140 | 87,158,167 | 1.000 | 0.810 | 0.224 | 0.065 | 0.001 | 0.001 |
| **25-29** | 6 | 6,635,693 | 91,353,310 | 97,989,003 | 1.000 | 0.810 | 0.224 | 0.065 | 0.001 | 0.001 |
| **30-34** | 7 | 6,496,402 | 122,242,568 | 128,738,970 | 1.000 | 0.780 | 0.224 | 0.065 | 0.001 | 0.001 |
| **35-39** | 8 | 7,379,797 | 92,711,658 | 100,091,455 | 1.000 | 0.780 | 0.224 | 0.065 | 0.001 | 0.001 |
| **40-44** | 9 | 6,906,755 | 89,367,391 | 96,274,146 | 1.000 | 0.840 | 0.305 | 0.102 | 0.002 | 0.007 |
| **45-49** | 10 | 5,733,610 | 114,104,007 | 119,837,617 | 1.000 | 0.840 | 0.305 | 0.102 | 0.002 | 0.007 |
| **50-54** | 11 | 3,264,296 | 120,181,086 | 123,445,382 | 1.000 | 0.840 | 0.305 | 0.102 | 0.007 | 0.007 |
| **55-59** | 12 | 2,214,108 | 96,526,383 | 98,740,491 | 1.000 | 0.840 | 0.305 | 0.102 | 0.007 | 0.007 |
| **60-64** | 13 | 711,933 | 76,802,206 | 77,514,139 | 1.000 | 0.890 | 0.355 | 0.120 | 0.009 | 0.037 |
| **65-69** | 14 | 295,280 | 73,854,486 | 74,149,766 | 1.650 | 0.890 | 0.355 | 0.120 | 0.025 | 0.037 |
| **70-74** | 15 | 33,563 | 44,842,807 | 44,949,689 | 1.650 | 0.780 | 0.355 | 0.120 | 0.025 | 0.037 |
| **75-79** | 16 | 48,461 | 26,496,155 | 26,544,616 | 1.650 | 0.780 | 0.355 | 0.120 | 0.025 | 0.037 |
| **80+** | 17 | 0 | 26,618,103 | 26,618,103 | 1.650 | 0.780 | 0.646 | 0.218 | 0.046 | 0.068 |

**Supplementary Information for “Dynamic optimization of COVID-19 vaccine prioritization in the context of limited supply”**

Supplementary Table 1| Targeted production capacities of vaccine manufacturers in China for 2021

| **Manufacture** | **Targeted annual production capacity (million)** | **unit** | **Reference/Source** |
| --- | --- | --- | --- |
| Sinopharm Group | 1,000 | dose | 15 |
| Anhui Zhifei Longcom Biopharmceutical Co. Ltd | 300 | dose | http://www.ahwang.cn/content/2020-11/24/content_2185341.html |
| BioKangtai | 200 | dose | https://www.thepaper.cn/newsDetail_forward_10055524 |
| Sinovac Biotech | 300 | dose | https://www.sohu.com/a/417128330_616825 |
| CanSino Biologics | 300 | dose | http://www.nbd.com.cn/articles/2020-09-07/1500145.html |
| Total | 2,100 | dose |  |
| Daily break down | 5.75 | dose |  |
| Two-dose daily break down | 2.87 | course |  |


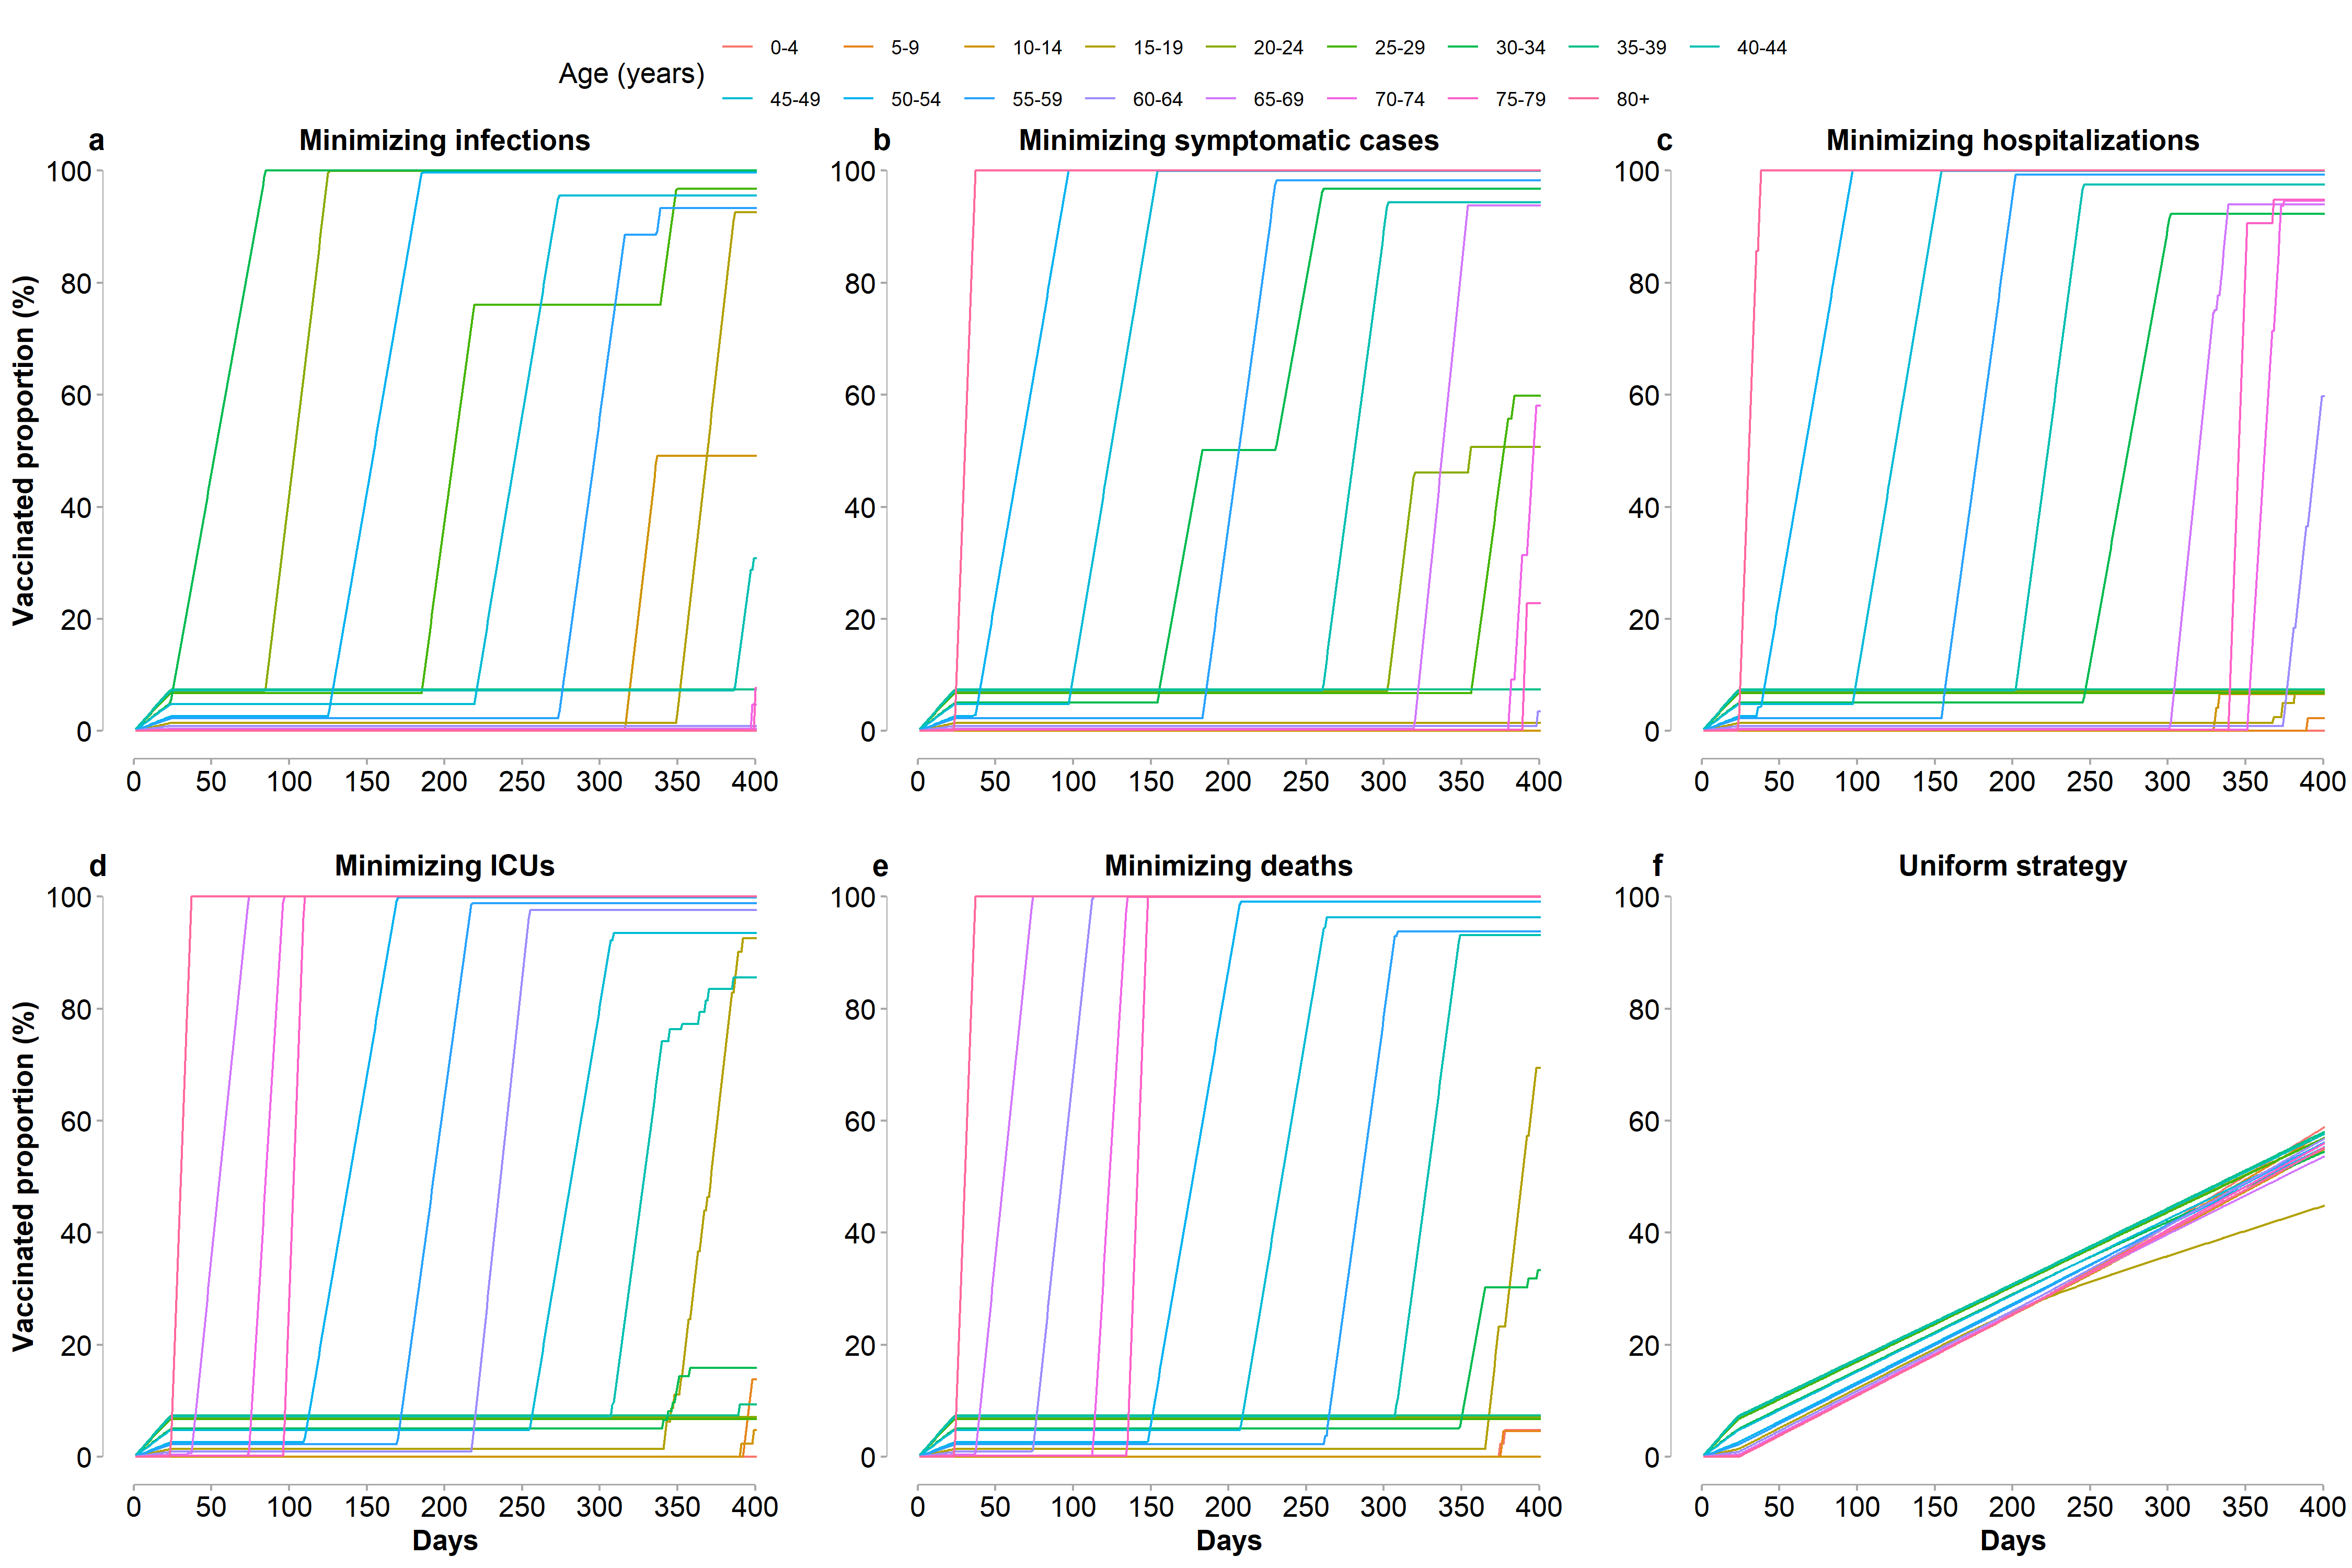


Supplementary Fig. 1| Vaccinated proportions over time in the baseline. a-e, Five optimal prioritization strategies for minimizing infections, symptomatic cases, hospitalizations, ICUs and deaths. f, The uniform strategy. Under the uniform strategy, vaccines are allocated proportionally to the size of unvaccinated susceptible populations, which changes over time. Keys and labels apply to all panels.

Supplementary Fig. 2 | The discrepancy between the all-or-nothing model and the leaky model decreases as supply increases (R = 1.5). Optimal prioritization strategies have close performances under the two models. The uniform strategy still cannot achieve close performances until 3.5 million courses and needs higher supplies.

Supplementary Fig. 3 | The discrepancy between the all-or-nothing model and the leaky model decreases as daily supply increases for the uniform strategy. It has the close performances above 2.5 million courses.


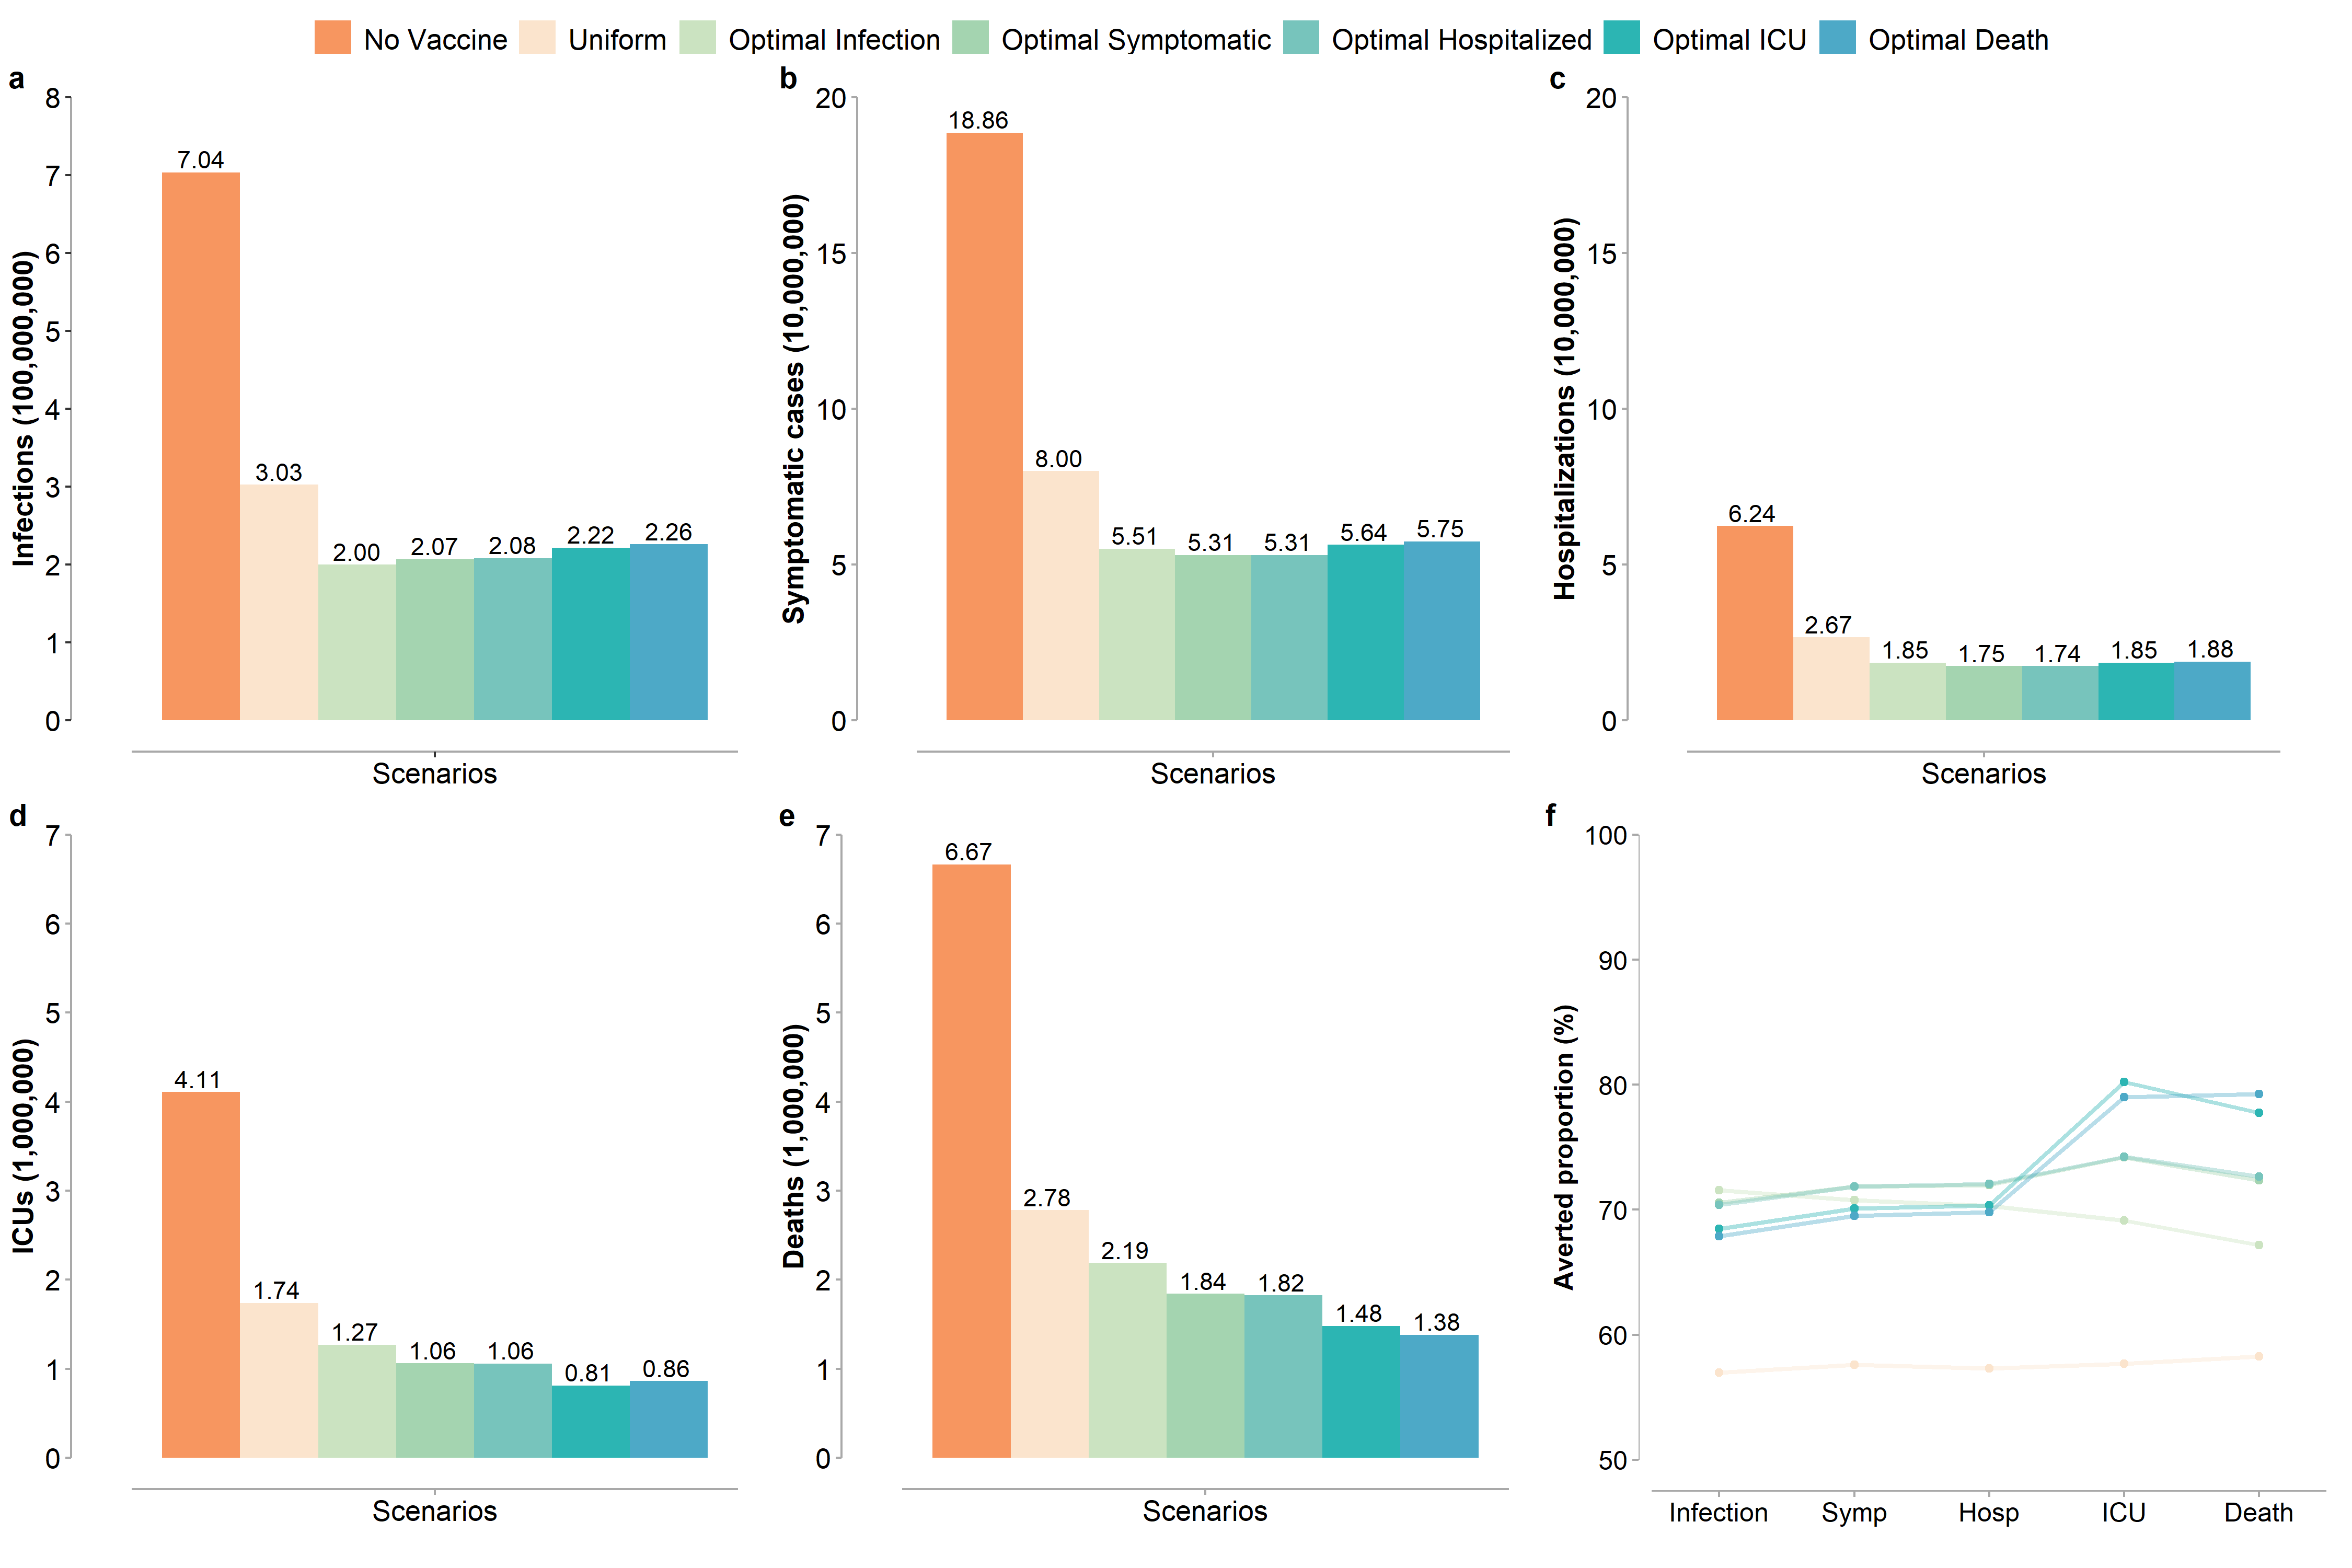


Supplementary Fig. 4 | Risk incidences under increased daily rollout speed. Rollout speed increases from 0.10% (1.5 million courses) to 0.17% (2.5 million courses) an average 0.14% (2.0 million courses). a, All strategies have more infections relative to the baseline. Advantage optimal prioritization strategies over the uniform strategy decreases. b-e, As for a, but for the number of symptomatic cases, hospitalizations, ICUs and deaths. f, Averted risk proportions of the six vaccination policies in comparison to the scenario with no vaccination. Findings apply to all the five risk measures. Keys apply to all panels.


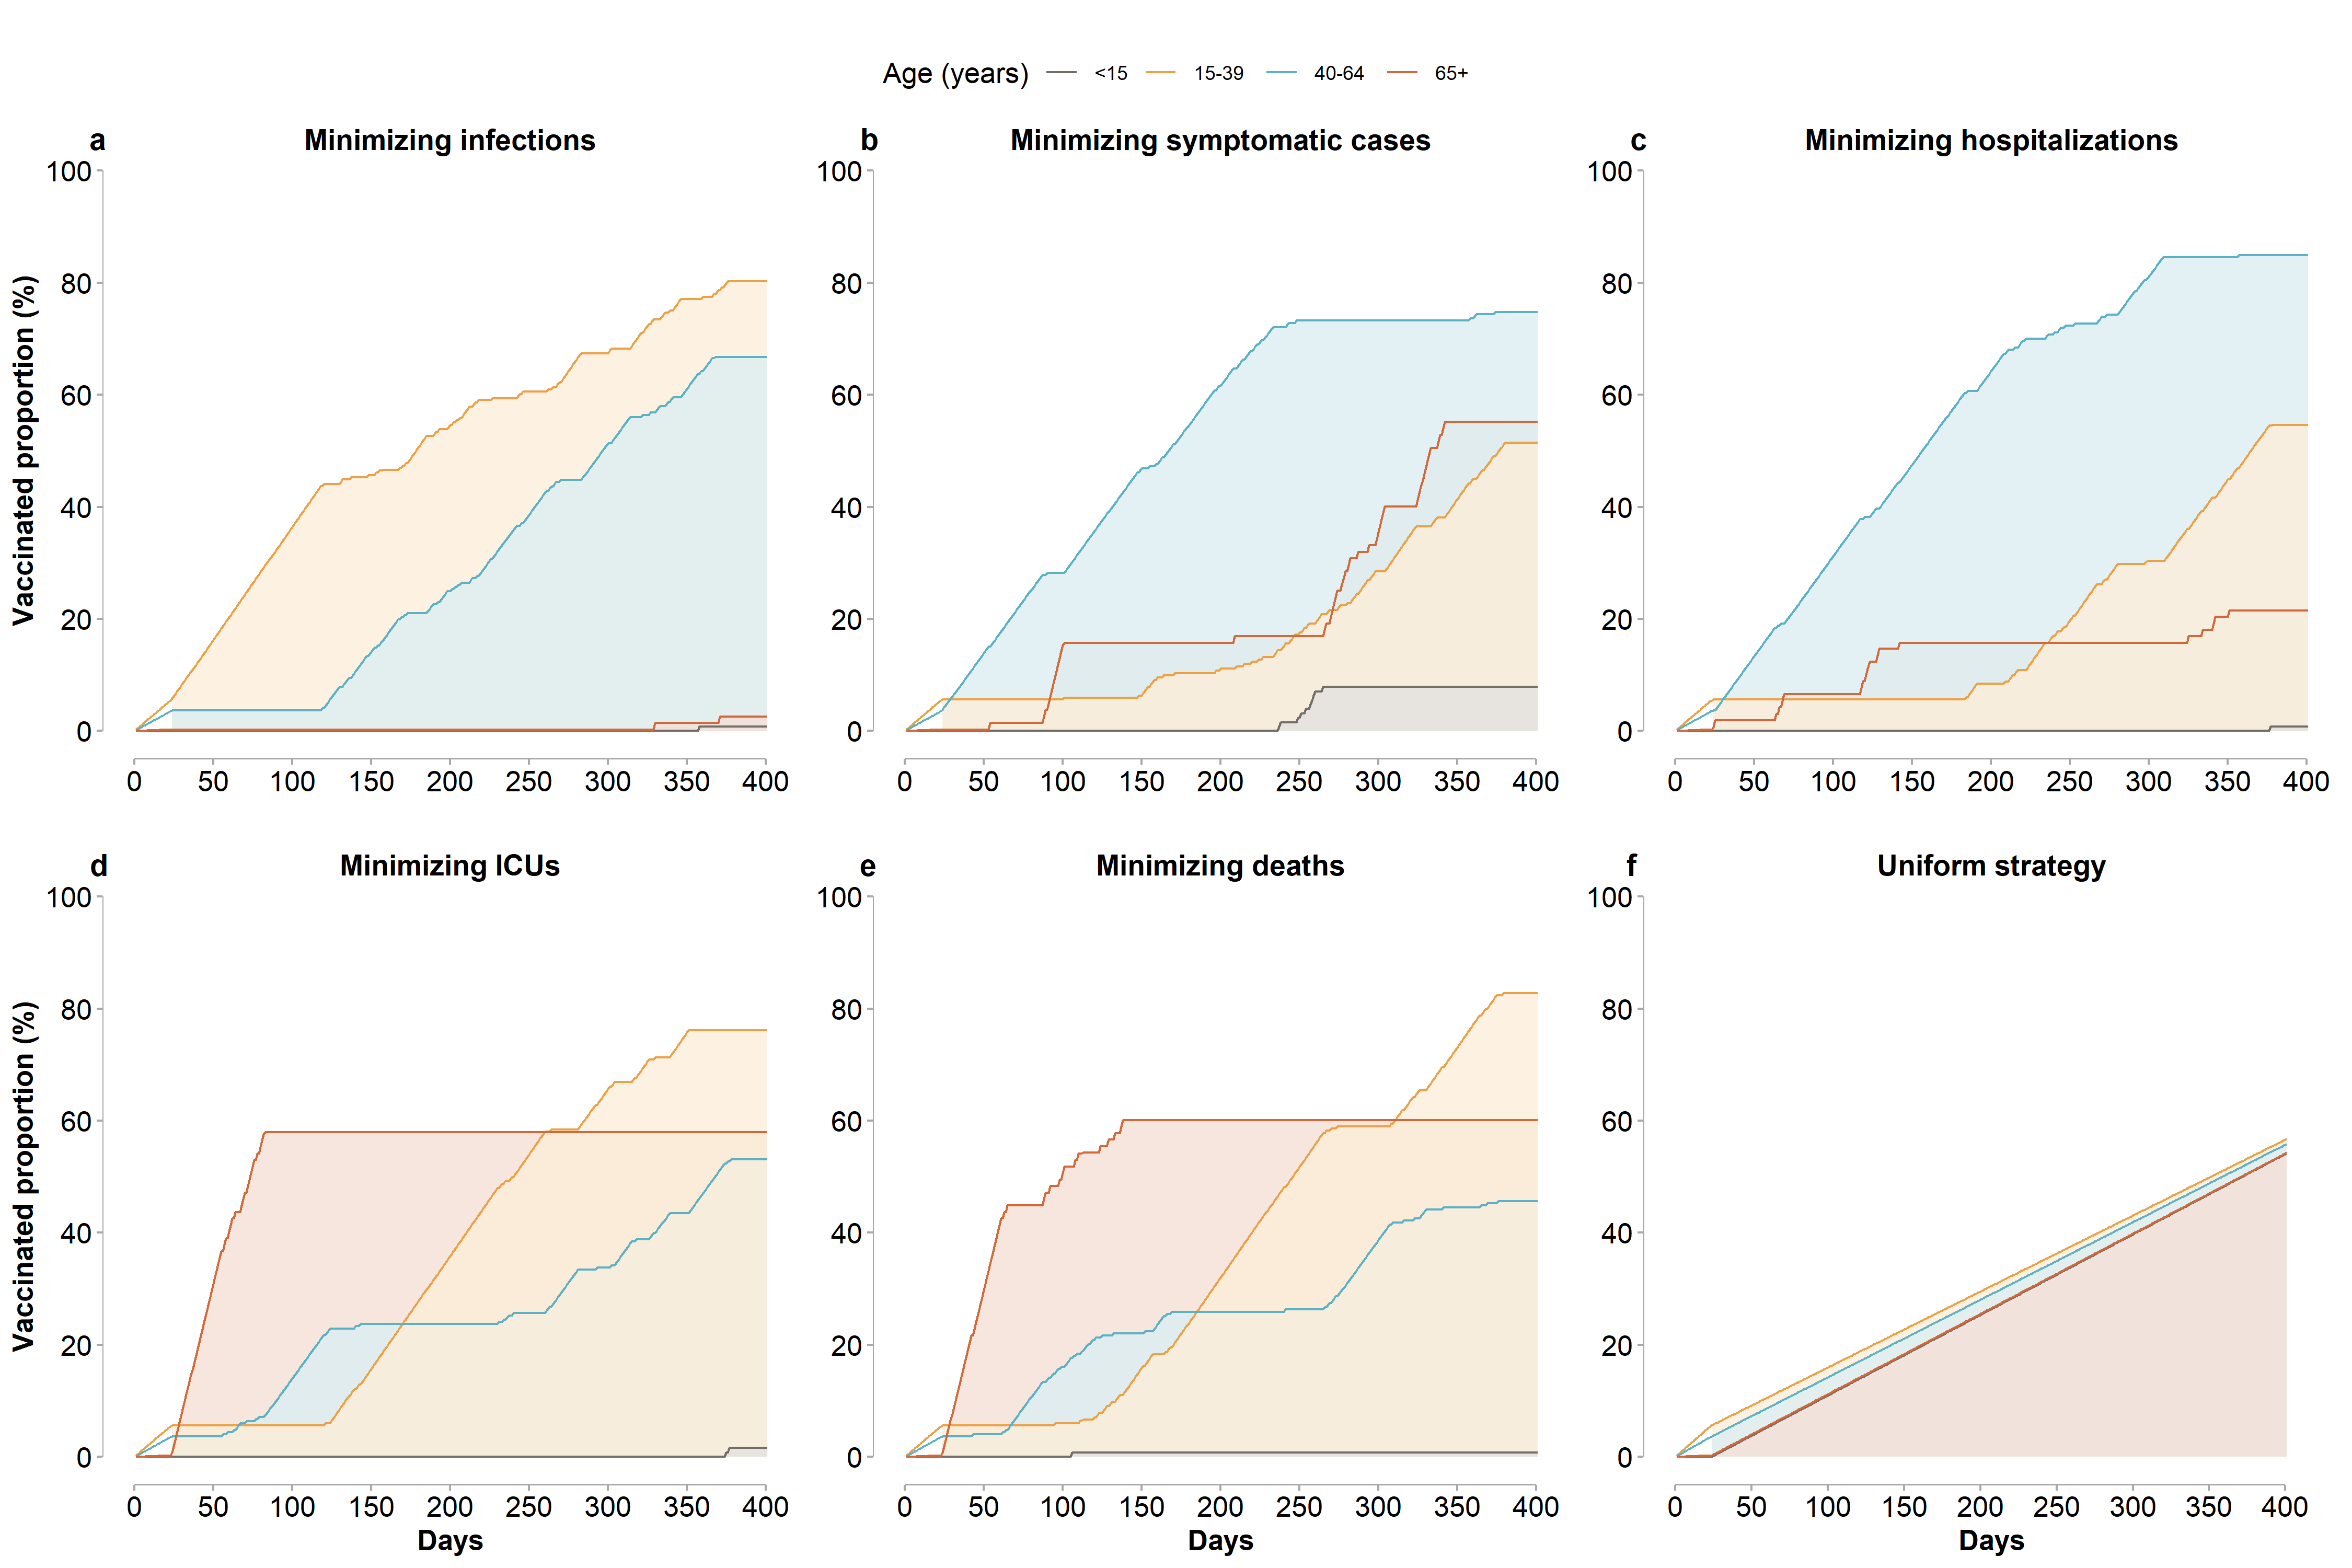


Supplementary Fig. 5 | Scenarios where optimal prioritization strategies for minimizing symptomatic cases and hospitalizations may vary (2 million supplies, 0.14% rollout speed, R = 1.25). a-f, Optimal prioritization strategy for minimizing infections, symptomatic cases, hospitalizations, ICUs, and deaths. b and c, adults over 65, the first priority group in baseline (Fig. 1), are identified as the second highest priority, while individuals aged 40-64, the second priority group in baseline (Fig. 1), are identified as the first priority.


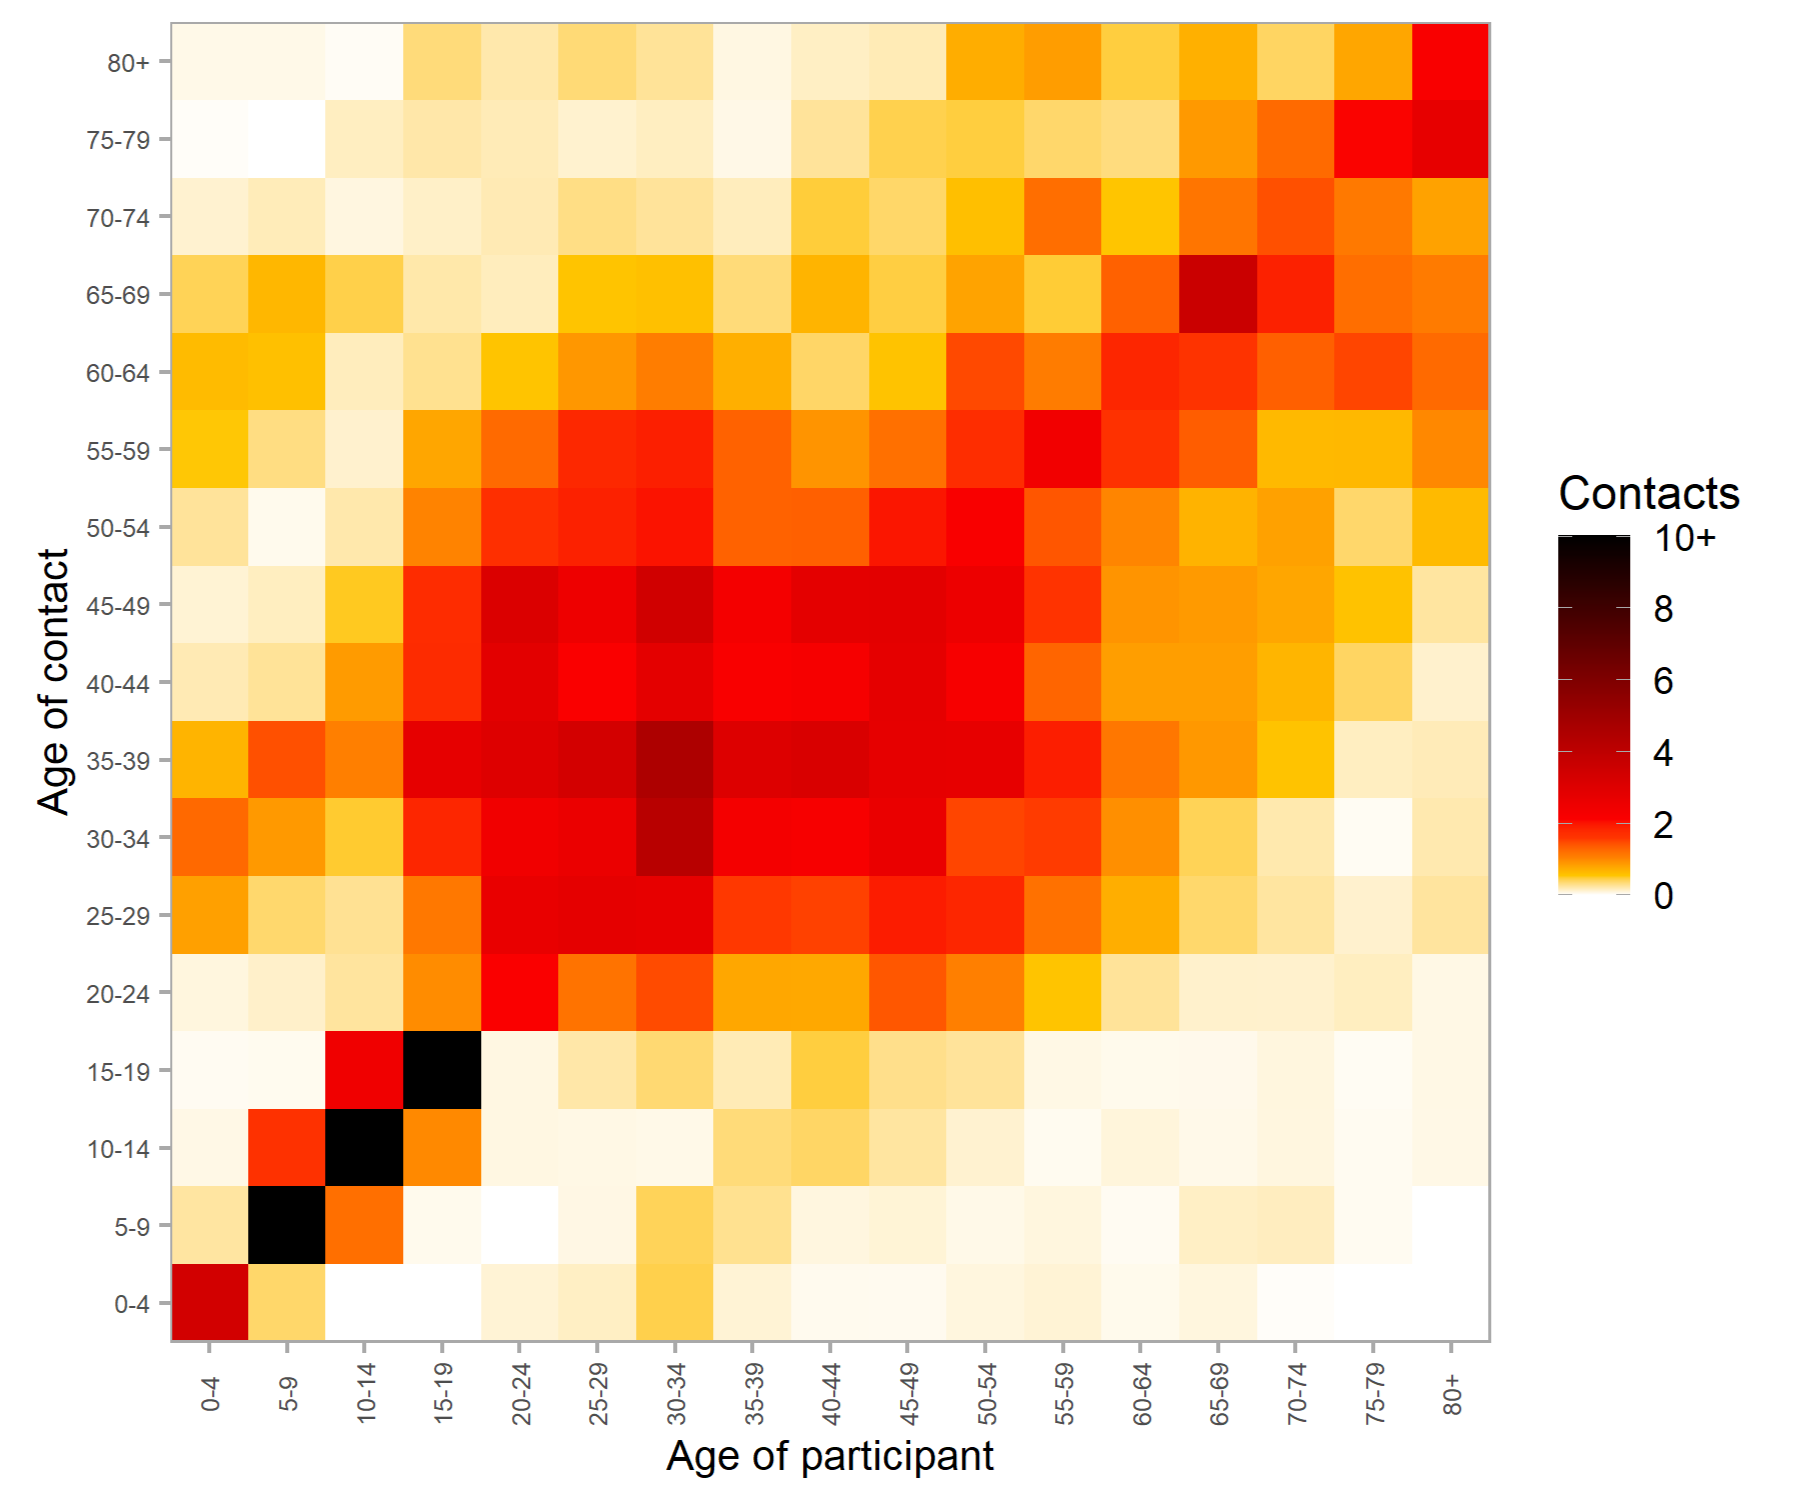


Supplementary Fig. 6 | Estimated contact numbers by age group in China.
